# Supplementary material for: Identification of biological pathways and genes associated with neurogenic heterotopic ossification by text mining
Source: PeerJ. 2020 Jan 3;8:e8276. doi: 10.7717/peerj.8276 (PMC6944123; doi:10.7717/peerj.8276)
Supplement: Supplemental Information 1 — Table S1: Concepts of disorders related to Heterotopic Ossification (HO). Table S2: Genes or gene products were suggested by using the end concept "Spinal Cord Injuries." Table S3: Genes or gene products were suggested by using the end concept "Compression of spinal cord." Table S4: Genes or gene products were suggested by using the end concept "Brain Injuries." Table S5: Genes or gene products were suggested by using the end concept "Craniocerebral Trauma." Table S6: Union of genes or gene products among different end concepts. Table S7: Cell function related to Heterotopic ossification and "Spinal Cord Injuries." [file peerj-08-8276-s001.xls]

## Sheet:  Table of Contents
	Table of Contents
Methodology	Title of the Tables
Open discovery methodology	Table S1 Concepts of disorder related to Heterotopic ossification
Closed discovery methodology	Table S2 Genes or gene product were suggested by using the end concept "Spinal Cord Injuries"
	Table S3 Genes or gene product were suggested by using the end concept "Compression of spinal cord"
	Table S4 Genes or gene product were suggested by using the end concept "Brain Injuries"
	Table S5 Genes or gene product were suggested by using the end concept "Craniocerebral Trauma"
	Table S6 The union of Genes or gene product among different end concept

## Sheet: Concepts 
Table S1 Concepts of disorder related to Heterotopic ossification
Concept Name	Semantic Type	Freq	Conf(%)
Postoperative Complications	Pathologic Function	428	8.869
Calcinosis	Disease or Syndrome	267	5.533
Fracture	Injury or Poisoning	161	3.336
Arthropathies NOS	Disease or Syndrome	138	2.86
Spinal Diseases	Disease or Syndrome	137	2.839
Metaplasia	Cell or Molecular Dysfunction	135	2.797
Spinal Cord Injuries	Injury or Poisoning	135	2.797
Mouse Fibroma	Neoplastic Process	133	2.756
Compression of spinal cord	Disease or Syndrome	113	2.341
Bone Diseases	Disease or Syndrome	108	2.238
Myositis Ossificans	Disease or Syndrome	106	2.196
Bone neoplasms	Neoplastic Process	97	2.01
Lung diseases	Disease or Syndrome	87	1.803
Paraplegia	Disease or Syndrome	86	1.782
Syndrome	Disease or Syndrome	84	1.741
Ankylosing spondylitis	Disease or Syndrome	84	1.741
Degenerative polyarthritis	Disease or Syndrome	76	1.575
Spinal Osteophytosis	Disease or Syndrome	76	1.575
Cicatrix	Finding	75	1.554
Ankylosis	Disease or Syndrome	70	1.45
Ankylosis	Acquired Abnormality	70	1.45
Brain Injuries	Injury or Poisoning	69	1.43
Soft Tissue Neoplasms	Neoplastic Process	62	1.285
Spinal Cord Diseases	Disease or Syndrome	59	1.223
Complete Hearing Loss	Disease or Syndrome	57	1.181
Mouse Adenocarcinoma	Neoplastic Process	56	1.16
Tracheal Diseases	Disease or Syndrome	56	1.16
Bone Diseases, Developmental	Disease or Syndrome	55	1.14
Chronic Disease	Disease or Syndrome	54	1.119
Osteoporosis	Finding	54	1.119
Dislocations	Injury or Poisoning	53	1.098
Spinal Stenosis	Disease or Syndrome	49	1.015
Rheumatoid Arthritis	Disease or Syndrome	48	0.995
skin disorder	Disease or Syndrome	48	0.995
Myopathy	Disease or Syndrome	47	0.974
Skin Neoplasms	Neoplastic Process	47	0.974
Osteoma	Neoplastic Process	46	0.953
Ectopic Tissue	Pathologic Function	44	0.912
Mouse Osteosarcoma	Neoplastic Process	44	0.912
Hip Dislocation	Injury or Poisoning	43	0.891
Quadriplegia	Disease or Syndrome	41	0.85
Osteochondritis	Disease or Syndrome	40	0.829
Bronchial Diseases	Disease or Syndrome	40	0.829
Craniocerebral Trauma	Injury or Poisoning	40	0.829
Hematoma	Pathologic Function	39	0.808
Cartilage Diseases	Disease or Syndrome	39	0.808
Burn injury	Injury or Poisoning	39	0.808
Arthritis	Disease or Syndrome	39	0.808
Femur Head Necrosis	Disease or Syndrome	38	0.787
Mandibular Neoplasms	Neoplastic Process	38	0.787

## Sheet: Spinal Cord Injuries
Table S2 Genes or gene product were suggested by using the end concept "Spinal Cord Injuries"
Genes Name	Concept Name	Semantic Type	FreqXY	ConfXY(%)	FreqYZ	ConfYZ(%)	FreqXY*FreqYZ	ConfXY*ConfYZ
BDNF	BDNF: brain-derived neurotrophic factor	Gene or Gene Product	1	0.021	88	2.611	88	0.054
GFAP	GFAP: glial fibrillary acidic protein	Gene or Gene Product	1	0.021	76	1.611	76	0.033
NUDT66	NUDT6: nudix (nucleoside diphosphate linked moiety X)-type motif 6	Gene or Gene Product	3	0.062	17	0.238	51	0.015
BMP7	BMP7: bone morphogenetic protein 7 (osteogenic protein 1)	Gene or Gene Product	1	0.021	2	0.621	2	0.013
NPAT	NPAT: nuclear protein, ataxia-telangiectasia locus	Gene or Gene Product	1	0.021	6	0.484	6	0.01
S100A12	S100A12: S100 calcium binding protein A12 (calgranulin C)	Gene or Gene Product	1	0.021	19	0.441	19	0.009
AR	AR: androgen receptor (dihydrotestosterone receptor; testicular feminization; spinal and bulbar muscular atrophy; Kennedy disease)	Gene or Gene Product	1	0.021	2	0.407	2	0.008
CNP	CNP: 2',3'-cyclic nucleotide 3' phosphodiesterase	Gene or Gene Product	1	0.021	3	0.317	3	0.007
VEGF	VEGF: vascular endothelial growth factor	Gene or Gene Product	3	0.062	9	0.092	27	0.006
FEV	FEV: FEV (ETS oncogene family)	Gene or Gene Product	1	0.021	1	0.235	1	0.005
YES1	YES1: v-yes-1 Yamaguchi sarcoma viral oncogene homolog 1	Gene or Gene Product	1	0.021	1	0.232	1	0.005
GCLC	GCLC: glutamate-cysteine ligase, catalytic subunit	Gene or Gene Product	1	0.021	1	0.23	1	0.005
DES	DES: desmin	Gene or Gene Product	4	0.083	5	0.051	20	0.004
PMAIP1	PMAIP1: phorbol-12-myristate-13-acetate-induced protein 1	Gene or Gene Product	1	0.021	1	0.166	1	0.003
FOS	FOS: v-fos FBJ murine osteosarcoma viral oncogene homolog	Gene or Gene Product	1	0.021	14	0.158	14	0.003
ROS1	ROS1: v-ros UR2 sarcoma virus oncogene homolog 1 (avian)	Gene or Gene Product	1	0.021	13	0.155	13	0.003
EMD	EMD: emerin (Emery-Dreifuss muscular dystrophy)	Gene or Gene Product	1	0.021	1	0.149	1	0.003
CAPG	CAPG: capping protein (actin filament), gelsolin-like	Gene or Gene Product	1	0.021	2	0.147	2	0.003
MSX2	MSX2: msh homeobox homolog 2 (Drosophila)	Gene or Gene Product	2	0.041	1	0.064	2	0.003
IBSP	IBSP: integrin-binding sialoprotein (bone sialoprotein, bone sialoprotein II)	Gene or Gene Product	1	0.021	1	0.117	1	0.002
MRAP	MRAP: melanocortin 2 receptor accessory protein	Gene or Gene Product	1	0.021	1	0.113	1	0.002
PCNA	PCNA: proliferating cell nuclear antigen	Gene or Gene Product	1	0.021	6	0.113	6	0.002
CD68	CD68: CD68 molecule	Gene or Gene Product	2	0.041	1	0.049	2	0.002
TNF	TNF: tumor necrosis factor (TNF superfamily, member 2)	Gene or Gene Product	1	0.021	19	0.085	19	0.002
SH2D1A	SH2D1A: SH2 domain protein 1A, Duncan's disease (lymphoproliferative syndrome)	Gene or Gene Product	1	0.021	1	0.083	1	0.002
MVP	MVP: major vault protein	Gene or Gene Product	1	0.021	1	0.08	1	0.002
BCAR1	BCAR1: breast cancer anti-estrogen resistance 1	Gene or Gene Product	2	0.041	1	0.036	2	0.002
CSE1L	CSE1L: CSE1 chromosome segregation 1-like (yeast)	Gene or Gene Product	2	0.041	1	0.036	2	0.002
POMC	POMC: proopiomelanocortin (adrenocorticotropin/ beta-lipotropin/ alpha-melanocyte stimulating hormone/ beta-melanocyte stimulating hormone/ beta-endorphin)	Gene or Gene Product	2	0.041	6	0.035	12	0.001
RPE	RPE: ribulose-5-phosphate-3-epimerase	Gene or Gene Product	1	0.021	2	0.067	2	0.001
PTH	PTH: parathyroid hormone	Gene or Gene Product	4	0.083	1	0.016	4	0.001
IL6	IL6: interleukin 6 (interferon, beta 2)	Gene or Gene Product	1	0.021	17	0.062	17	0.001
VIP	VIP: vasoactive intestinal peptide	Gene or Gene Product	1	0.021	3	0.049	3	0.001
CPAMD8	CPAMD8: C3 and PZP-like, alpha-2-macroglobulin domain containing 8	Gene or Gene Product	1	0.021	3	0.049	3	0.001
PORCN	PORCN: porcupine homolog (Drosophila)	Gene or Gene Product	1	0.021	4	0.046	4	0.001
CD34	CD34: CD34 molecule	Gene or Gene Product	1	0.021	4	0.045	4	0.001
NPY	NPY: neuropeptide Y	Gene or Gene Product	1	0.021	2	0.042	2	0.001
HLA-A	HLA-A: major histocompatibility complex, class I, A	Gene or Gene Product	1	0.021	1	0.027	1	0.001
CD4	CD4: CD4 molecule	Gene or Gene Product	1	0.021	11	0.025	11	0.001
PIP	PIP: prolactin-induced protein	Gene or Gene Product	1	0.021	2	0.024	2	0.001
IL5	IL5: interleukin 5 (colony-stimulating factor, eosinophil)	Gene or Gene Product	1	0.021	1	0.018	1	0
IL4	IL4: interleukin 4	Gene or Gene Product	1	0.021	3	0.017	3	0

## Sheet: Compression of spinal cord
Table S3 Genes or gene product were suggested by using the end concept "Compression of spinal cord"
Genes Name	Concept Name	Semantic Type	FreqXY	ConfXY(%)	FreqYZ	ConfYZ(%)	FreqXY*FreqYZ	ConfXY*ConfYZ
TMTC1	TMTC1: transmembrane and tetratricopeptide repeat containing 1	Gene or Gene Product	7	0.145	2	4.762	14	0.691
HLF	HLF: hepatic leukemia factor	Gene or Gene Product	1	0.021	1	0.645	1	0.013
DES	DES: desmin	Gene or Gene Product	4	0.083	5	0.051	20	0.004
AR	AR: androgen receptor (dihydrotestosterone receptor; testicular feminization; spinal and bulbar muscular atrophy; Kennedy disease)	Gene or Gene Product	1	0.021	1	0.203	1	0.004
PFDN4	PFDN4: prefoldin subunit 4	Gene or Gene Product	1	0.021	2	0.166	2	0.003
BCAR1	BCAR1: breast cancer anti-estrogen resistance 1	Gene or Gene Product	2	0.041	2	0.073	4	0.003
CSE1L	CSE1L: CSE1 chromosome segregation 1-like (yeast)	Gene or Gene Product	2	0.041	2	0.072	4	0.003
COL9A2	COL9A2: collagen, type IX, alpha 2	Gene or Gene Product	1	0.021	1	0.125	1	0.003
BDNF	BDNF: brain-derived neurotrophic factor	Gene or Gene Product	1	0.021	3	0.089	3	0.002
GFAP	GFAP: glial fibrillary acidic protein	Gene or Gene Product	1	0.021	3	0.064	3	0.001
VEGF	VEGF: vascular endothelial growth factor	Gene or Gene Product	3	0.062	2	0.021	6	0.001
PORCN	PORCN: porcupine homolog (Drosophila)	Gene or Gene Product	1	0.021	5	0.058	5	0.001
DYM	DYM: dymeclin	Gene or Gene Product	1	0.021	1	0.029	1	0.001
ROS1	ROS1: v-ros UR2 sarcoma virus oncogene homolog 1 (avian)	Gene or Gene Product	1	0.021	2	0.024	2	0
S100A12	S100A12: S100 calcium binding protein A12 (calgranulin C)	Gene or Gene Product	1	0.021	1	0.023	1	0
TNF	TNF: tumor necrosis factor (TNF superfamily, member 2)	Gene or Gene Product	1	0.021	3	0.013	3	0
POMC	POMC: proopiomelanocortin (adrenocorticotropin/ beta-lipotropin/ alpha-melanocyte stimulating hormone/ beta-melanocyte stimulating hormone/ beta-endorphin)	Gene or Gene Product	2	0.041	1	0.006	2	0
CD34	CD34: CD34 molecule	Gene or Gene Product	1	0.021	1	0.011	1	0
IL6	IL6: interleukin 6 (interferon, beta 2)	Gene or Gene Product	1	0.021	1	0.004	1	0

## Sheet: Brain Injuries
Table S4 Genes or gene product were suggested by using the end concept "Brain Injuries"
Genes Name	Concept Name	Semantic Type	FreqXY	ConfXY(%)	FreqYZ	ConfYZ(%)	FreqXY*FreqYZ	ConfXY*ConfYZ
GCLC	GCLC: glutamate-cysteine ligase, catalytic subunit	Gene or Gene Product	1	0.021	35	8.046	35	0.167
GFAP	GFAP: glial fibrillary acidic protein	Gene or Gene Product	1	0.021	160	3.392	160	0.07
NUDT6	NUDT6: nudix (nucleoside diphosphate linked moiety X)-type motif 6	Gene or Gene Product	3	0.062	40	0.561	120	0.035
BDNF	BDNF: brain-derived neurotrophic factor	Gene or Gene Product	1	0.021	47	1.394	47	0.029
DES	DES: desmin	Gene or Gene Product	4	0.083	20	0.203	80	0.017
BMPR2	BMPR2: bone morphogenetic protein receptor, type II (serine/threonine kinase)	Gene or Gene Product	1	0.021	1	0.758	1	0.016
VEGF	VEGF: vascular endothelial growth factor	Gene or Gene Product	3	0.062	18	0.185	54	0.011
DBH	DBH: dopamine beta-hydroxylase (dopamine beta-monooxygenase)	Gene or Gene Product	5	0.104	1	0.099	5	0.01
INHBE	INHBE: inhibin, beta E	Gene or Gene Product	2	0.041	5	0.221	10	0.009
FOS	FOS: v-fos FBJ murine osteosarcoma viral oncogene homolog	Gene or Gene Product	1	0.021	36	0.406	36	0.008
NPAT	NPAT: nuclear protein, ataxia-telangiectasia locus	Gene or Gene Product	1	0.021	5	0.404	5	0.008
LCT	LCT: lactase	Gene or Gene Product	1	0.021	1	0.365	1	0.008
PMAIP1	PMAIP1: phorbol-12-myristate-13-acetate-induced protein 1	Gene or Gene Product	1	0.021	2	0.332	2	0.007
ROS1	ROS1: v-ros UR2 sarcoma virus oncogene homolog 1 (avian)	Gene or Gene Product	1	0.021	23	0.275	23	0.006
ENG	ENG: endoglin (Osler-Rendu-Weber syndrome 1)	Gene or Gene Product	1	0.021	2	0.272	2	0.006
MSX2	MSX2: msh homeobox homolog 2 (Drosophila)	Gene or Gene Product	2	0.041	2	0.129	4	0.005
UBXD5	UBXD5: UBX domain containing 5	Gene or Gene Product	1	0.021	1	0.247	1	0.005
IL6	IL6: interleukin 6 (interferon, beta 2)	Gene or Gene Product	1	0.021	66	0.243	66	0.005
YES1	YES1: v-yes-1 Yamaguchi sarcoma viral oncogene homolog 1	Gene or Gene Product	1	0.021	1	0.232	1	0.005
MCF2L	MCF2L: MCF.2 cell line derived transforming sequence-like	Gene or Gene Product	1	0.021	1	0.212	1	0.004
PCNA	PCNA: proliferating cell nuclear antigen	Gene or Gene Product	1	0.021	11	0.207	11	0.004
CD68	CD68: CD68 molecule	Gene or Gene Product	2	0.041	2	0.097	4	0.004
PAOX	PAOX: polyamine oxidase (exo-N4-amino)	Gene or Gene Product	1	0.021	1	0.172	1	0.004
SMOX	SMOX: spermine oxidase	Gene or Gene Product	1	0.021	1	0.158	1	0.003
EMD	EMD: emerin (Emery-Dreifuss muscular dystrophy)	Gene or Gene Product	1	0.021	1	0.149	1	0.003
TNF	TNF: tumor necrosis factor (TNF superfamily, member 2)	Gene or Gene Product	1	0.021	33	0.148	33	0.003
BCAR1	BCAR1: breast cancer anti-estrogen resistance 1	Gene or Gene Product	2	0.041	2	0.073	4	0.003
CSE1L	CSE1L: CSE1 chromosome segregation 1-like (yeast)	Gene or Gene Product	2	0.041	2	0.072	4	0.003
PTH	PTH: parathyroid hormone	Gene or Gene Product	4	0.083	2	0.032	8	0.003
PORCN	PORCN: porcupine homolog (Drosophila)	Gene or Gene Product	1	0.021	10	0.115	10	0.002
POMC	POMC: proopiomelanocortin (adrenocorticotropin/ beta-lipotropin/ alpha-melanocyte stimulating hormone/ beta-melanocyte stimulating hormone/ beta-endorphin)	Gene or Gene Product	2	0.041	9	0.052	18	0.002
ABR	ABR: active BCR-related gene	Gene or Gene Product	1	0.021	1	0.096	1	0.002
DYM	DYM: dymeclin	Gene or Gene Product	1	0.021	3	0.087	3	0.002
SH2D1A	SH2D1A: SH2 domain protein 1A, Duncan's disease (lymphoproliferative syndrome)	Gene or Gene Product	1	0.021	1	0.083	1	0.002
CAPG	CAPG: capping protein (actin filament), gelsolin-like	Gene or Gene Product	1	0.021	1	0.073	1	0.002
S100A12	S100A12: S100 calcium binding protein A12 (calgranulin C)	Gene or Gene Product	1	0.021	3	0.07	3	0.001
HLA-A	HLA-A: major histocompatibility complex, class I, A	Gene or Gene Product	1	0.021	1	0.027	1	0.001
CD40LG	CD40LG: CD40 ligand (TNF superfamily, member 5, hyper-IgM syndrome)	Gene or Gene Product	1	0.021	1	0.025	1	0.001
NPY	NPY: neuropeptide Y	Gene or Gene Product	1	0.021	1	0.021	1	0
VIP	VIP: vasoactive intestinal peptide	Gene or Gene Product	1	0.021	1	0.016	1	0
CPAMD8	CPAMD8: C3 and PZP-like, alpha-2-macroglobulin domain containing 8	Gene or Gene Product	1	0.021	1	0.016	1	0
CD4	CD4: CD4 molecule	Gene or Gene Product	1	0.021	6	0.014	6	0
CD34	CD34: CD34 molecule	Gene or Gene Product	1	0.021	1	0.011	1	0
IL4	IL4: interleukin 4	Gene or Gene Product	1	0.021	2	0.011	2	0

## Sheet: Craniocerebral Trauma
Table S5 Genes or gene product were suggested by using the end concept "Craniocerebral Trauma"
Genes Name	Concept Name	Semantic Type	FreqXY	ConfXY(%)	FreqYZ	ConfYZ(%)	FreqXY*FreqYZ	ConfXY*ConfYZ
GCLC	GCLC: glutamate-cysteine ligase, catalytic subunit	Gene or Gene Product	1	0.021	27	6.207	27	0.129
AR	AR: androgen receptor (dihydrotestosterone receptor; testicular feminization; spinal and bulbar muscular atrophy; Kennedy disease)	Gene or Gene Product	1	0.021	5	1.016	5	0.021
DES	DES: desmin	Gene or Gene Product	4	0.083	16	0.163	64	0.013
PDLIM3	PDLIM3: PDZ and LIM domain 3	Gene or Gene Product	7	0.145	2	0.084	14	0.012
ATRNL1	ATRNL1: attractin-like 1	Gene or Gene Product	7	0.145	2	0.084	14	0.012
CCL27	CCL27: chemokine (C-C motif) ligand 27	Gene or Gene Product	7	0.145	2	0.079	14	0.011
SLPI	SLPI: secretory leukocyte peptidase inhibitor	Gene or Gene Product	7	0.145	2	0.074	14	0.011
MYST1	MYST1: MYST histone acetyltransferase 1	Gene or Gene Product	1	0.021	1	0.478	1	0.01
GULOP	GULOP: gulonolactone (L-) oxidase pseudogene	Gene or Gene Product	2	0.041	1	0.231	2	0.01
ABR	ABR: active BCR-related gene	Gene or Gene Product	1	0.021	4	0.384	4	0.008
EMD	EMD: emerin (Emery-Dreifuss muscular dystrophy)	Gene or Gene Product	1	0.021	2	0.298	2	0.006
ENG	ENG: endoglin (Osler-Rendu-Weber syndrome 1)	Gene or Gene Product	1	0.021	2	0.272	2	0.006
MCF2L	MCF2L: MCF.2 cell line derived transforming sequence-like	Gene or Gene Product	1	0.021	1	0.212	1	0.004
CD68	CD68: CD68 molecule	Gene or Gene Product	2	0.041	2	0.097	4	0.004
PMAIP1	PMAIP1: phorbol-12-myristate-13-acetate-induced protein 1	Gene or Gene Product	1	0.021	1	0.166	1	0.003
GFAP	GFAP: glial fibrillary acidic protein	Gene or Gene Product	1	0.021	5	0.106	5	0.002
BCAR1	BCAR1: breast cancer anti-estrogen resistance 1	Gene or Gene Product	2	0.041	1	0.036	2	0.002
CSE1L	CSE1L: CSE1 chromosome segregation 1-like (yeast)	Gene or Gene Product	2	0.041	1	0.036	2	0.002
PTH	PTH: parathyroid hormone	Gene or Gene Product	4	0.083	1	0.016	4	0.001
NUDT6	NUDT6: nudix (nucleoside diphosphate linked moiety X)-type motif 6	Gene or Gene Product	3	0.062	1	0.014	3	0.001
ROS1	ROS1: v-ros UR2 sarcoma virus oncogene homolog 1 (avian)	Gene or Gene Product	1	0.021	3	0.036	3	0.001
POMC	POMC: proopiomelanocortin (adrenocorticotropin/ beta-lipotropin/ alpha-melanocyte stimulating hormone/ beta-melanocyte stimulating hormone/ beta-endorphin)	Gene or Gene Product	2	0.041	3	0.017	6	0.001
IL6	IL6: interleukin 6 (interferon, beta 2)	Gene or Gene Product	1	0.021	7	0.026	7	0.001
PORCN	PORCN: porcupine homolog (Drosophila)	Gene or Gene Product	1	0.021	2	0.023	2	0
NPY	NPY: neuropeptide Y	Gene or Gene Product	1	0.021	1	0.021	1	0
CD4	CD4: CD4 molecule	Gene or Gene Product	1	0.021	5	0.011	5	0
TNF	TNF: tumor necrosis factor (TNF superfamily, member 2)	Gene or Gene Product	1	0.021	2	0.009	2	0

## Sheet:  Union(close) 
Table S6 The union of Genes or gene product among different end concepts
Brain Injuries	Craniocerebral Trauma	Spinal Cord Injuries	Compression of spinal cord	Union	NO.
GCLC	GCLC	BDNF	TMTC1	GCLC	1
GFAP	AR	GFAP	HLF	GFAP	2
NUDT6	DES	NUDT66	DES	NUDT6	3
BDNF	PDLIM3	BMP7	AR	BDNF	4
DES	ATRNL1	NPAT	PFDN4	DES	5
BMPR2	CCL27	S100A12	BCAR1	BMPR2	6
VEGF	SLPI	AR	CSE1L	VEGF	7
DBH	MYST1	CNP	COL9A2	DBH	8
INHBE	GULOP	VEGF	BDNF	INHBE	9
FOS	ABR	FEV	GFAP	FOS	10
NPAT	EMD	YES1	VEGF	NPAT	11
LCT	ENG	GCLC	PORCN	LCT	12
PMAIP1	MCF2L	DES	DYM	PMAIP1	13
ROS1	CD68	PMAIP1	ROS1	ROS1	14
ENG	PMAIP1	FOS	S100A12	ENG	15
MSX2	GFAP	ROS1	TNF	MSX2	16
UBXD5	BCAR1	EMD	POMC	UBXD5	17
IL6	CSE1L	CAPG	CD34	IL6	18
YES1	PTH	MSX2	IL6	YES1	19
MCF2L	NUDT6	IBSP		MCF2L	20
PCNA	ROS1	MRAP		PCNA	21
CD68	POMC	PCNA		CD68	22
PAOX	IL6	CD68		PAOX	23
SMOX	PORCN	TNF		SMOX	24
EMD	NPY	SH2D1A		EMD	25
TNF	CD4	MVP		TNF	26
BCAR1	TNF	BCAR1		BCAR1	27
CSE1L		CSE1L		CSE1L	28
PTH		POMC		PTH	29
PORCN		RPE		PORCN	30
POMC		PTH		POMC	31
ABR		IL6		ABR	32
DYM		VIP		DYM	33
SH2D1A		CPAMD8		SH2D1A	34
CAPG		PORCN		CAPG	35
S100A12		CD34		S100A12	36
HLA-A		NPY		HLA-A	37
CD40LG		HLA-A		CD40LG	38
NPY		CD4		NPY	39
VIP		PIP		VIP	40
CPAMD8		IL5		CPAMD8	41
CD4		IL4		CD4	42
CD34				CD34	43
IL4				IL4	44
				GCLC	45
				AR	46
				PDLIM3	47
				ATRNL1	48
				CCL27	49
				SLPI	50
				MYST1	51
				GULOP	52
				NUDT66	53
				BMP7	54
				CNP	55
				FEV	56
				IBSP	57
				MRAP	58
				MVP	59
				RPE	60
				PIP	61
				IL5	62
				TMTC1	63
				HLF	64
				PFDN4	65
				COL9A2	66

## Sheet: Intersection(close)
	Table S7 The intersection of genes or gene product among "TBI-HO" and "SCI-HO"
	33 common elements in "TBI-HO" and "SCI-HO":	18 elements included exclusively in "TBI-HO":				14 elements included exclusively in "SCI-HO":
	GCLC	NUDT6				NUDT66
	GFAP	BMPR2				BMP7
	BDNF	DBH				CNP
	DES	INHBE				FEV
	VEGF	LCT				IBSP
	FOS	ENG				MRAP
	NPAT	UBXD5				MVP
	PMAIP1	MCF2L				RPE
	ROS1	PAOX				PIP
	MSX2	SMOX				IL5
	IL6	ABR				TMTC1
	YES1	CD40LG				HLF
	PCNA	PDLIM3				PFDN4
	CD68	ATRNL1				COL9A2
	EMD	CCL27
	TNF	SLPI
	BCAR1	MYST1
	CSE1L	GULOP
	PTH
	PORCN
	POMC
	DYM
	SH2D1A
	CAPG
	S100A12
	HLA-A
	NPY
	VIP
	CPAMD8
	CD4
	CD34
	IL4
	AR
