# Supplementary material for: Identification of biological pathways and genes associated with neurogenic heterotopic ossification by text mining
Source: PeerJ. 2020 Jan 3;8:e8276. doi: 10.7717/peerj.8276 (PMC6944123; doi:10.7717/peerj.8276)
Supplement: Supplemental Information 2 — Table S8: Cell function related to Heterotopic ossification "Compression of spinal cord." Table S9: Cell function related to Heterotopic ossification "Brain Injuries." Table S10: Cell function related to Heterotopic ossification "Craniocerebral Trauma." [file peerj-08-8276-s002.xls]

## Sheet: Table of Contents
			Table of Contents
			Table S8 Cell function related to Heterotopic ossification "Spinal Cord Injuries"
			Table S9 Cell function related to Heterotopic ossification "Compression of spinal cord"
			Table S10 Cell function related to Heterotopic ossification "Brain Injuries"
			Table S11 Cell function related to Heterotopic ossification "Craniocerebral Trauma"

## Sheet: Spinal Cord Injuries
Table S8 Cell function related to Heterotopic ossification and "Spinal Cord Injuries"
Concept Name	Semantic Type	FreqXY	ConfXY(%)	FreqYZ	ConfYZ(%)	FreqXY*FreqYZ	ConfXY*ConfYZ	NO.
Nerve Regeneration	Cell Function	1	0.021	739	5.536	739	0.115	1
Cell Differentiation process	Cell Function	34	0.705	85	0.088	2890	0.062	2
Neural Conduction	Cell Function	3	0.062	152	0.728	456	0.045	3
Cell division	Cell Function	22	0.456	66	0.042	1452	0.019	4
Spermatogenesis	Cell Function	2	0.041	25	0.237	50	0.01	5
cell motility	Cell Function	3	0.062	50	0.138	150	0.009	6
Cell Survival	Cell Function	2	0.041	117	0.169	234	0.007	7
Apoptosis	Cell Function	2	0.041	123	0.16	246	0.007	8
Cell Proliferation	Cell Function	2	0.041	11	0.139	22	0.006	9
Signal Transduction	Cell Function	4	0.083	42	0.04	168	0.003	10
Metabolic Process, Cellular	Cell Function	4	0.083	8	0.039	32	0.003	11
Macrophage Activation	Cell Function	1	0.021	12	0.155	12	0.003	12
Phagocytosis	Cell Function	3	0.062	18	0.051	54	0.003	13
Down-Regulation	Cell Function	1	0.021	20	0.092	20	0.002	14
Cell Communication	Cell Function	1	0.021	14	0.087	14	0.002	15
Mitosis	Cell Function	4	0.083	6	0.018	24	0.002	16
Embryonic Induction	Cell Function	1	0.021	2	0.067	2	0.001	17
Cell Adhesion	Cell Function	3	0.062	8	0.019	24	0.001	18
Cell Hypoxia	Cell Function	1	0.021	3	0.051	3	0.001	19
Cell Membrane Permeability	Cell Function	1	0.021	6	0.025	6	0.001	20
Lymphocyte Activation	Cell Function	1	0.021	13	0.016	13	0	21
Chemotaxis	Cell Function	1	0.021	1	0.013	1	0	22

## Sheet: Compression of spinal cord
Table S9 Cell function related to Heterotopic ossification "Compression of spinal cord"
Concept Name	Semantic Type	FreqXY	ConfXY(%)	FreqYZ	ConfYZ(%)	FreqXY*FreqYZ	ConfXY*ConfYZ	NO.
Neural Conduction	Cell Function	3	0.062	54	0.259	162	0.016	1
Nerve Regeneration	Cell Function	1	0.021	26	0.195	26	0.004	2
Cell division	Cell Function	22	0.456	5	0.003	110	0.001	3
Cell Differentiation process	Cell Function	34	0.705	1	0.001	34	0.001	4
Apoptosis	Cell Function	2	0.041	6	0.008	12	0	5
Macrophage Activation	Cell Function	1	0.021	1	0.013	1	0	6
Signal Transduction	Cell Function	4	0.083	2	0.002	8	0	7
Cell Adhesion	Cell Function	3	0.062	1	0.002	3	0	8
Cell Survival	Cell Function	2	0.041	1	0.001	2	0	9

## Sheet: Brain Injuries
Table S10 Cell function related to Heterotopic ossification "Brain Injuries"
Concept Name	Semantic Type	FreqXY	ConfXY(%)	FreqYZ	ConfYZ(%)	FreqXY*FreqYZ	ConfXY*ConfYZ	NO.
Cell Differentiation process	Cell Function	34	0.705	67	0.069	2278	0.049	1
Nerve Regeneration	Cell Function	1	0.021	219	1.641	219	0.034	2
Cell division	Cell Function	22	0.456	107	0.068	2354	0.031	3
Apoptosis	Cell Function	2	0.041	209	0.271	418	0.011	4
cell motility	Cell Function	3	0.062	57	0.157	171	0.01	5
Mitosis	Cell Function	4	0.083	29	0.088	116	0.007	6
Neural Conduction	Cell Function	3	0.062	24	0.115	72	0.007	7
Cell Proliferation	Cell Function	2	0.041	12	0.152	24	0.006	8
Cell Survival	Cell Function	2	0.041	105	0.152	210	0.006	9
Phagocytosis	Cell Function	3	0.062	32	0.091	96	0.006	10
Signal Transduction	Cell Function	4	0.083	70	0.067	280	0.006	11
Metabolic Process, Cellular	Cell Function	4	0.083	12	0.059	48	0.005	12
Down-Regulation	Cell Function	1	0.021	36	0.165	36	0.003	13
Cell Communication	Cell Function	1	0.021	21	0.13	21	0.003	14
Cell Adhesion	Cell Function	3	0.062	16	0.039	48	0.002	15
Cell Membrane Permeability	Cell Function	1	0.021	20	0.082	20	0.002	16
Cell Hypoxia	Cell Function	1	0.021	4	0.067	4	0.001	17
Macrophage Activation	Cell Function	1	0.021	4	0.052	4	0.001	18
Chemotaxis	Cell Function	1	0.021	4	0.051	4	0.001	19
Cell Aggregation	Cell Function	2	0.041	1	0.015	2	0.001	20
Spermatogenesis	Cell Function	2	0.041	1	0.009	2	0	21
Lymphocyte Activation	Cell Function	1	0.021	11	0.014	11	0	22

## Sheet: Craniocerebral Trauma
Table S11 Cell function related to Heterotopic ossification "Craniocerebral Trauma"
Concept Name	Semantic Type	FreqXY	ConfXY(%)	FreqYZ	ConfYZ(%)	FreqXY*FreqYZ	ConfXY*ConfYZ	NO.
Metabolic Process, Cellular	Cell Function	4	0.083	9	0.044	36	0.004	1
Neural Conduction	Cell Function	3	0.062	12	0.057	36	0.004	2
Cell Differentiation process	Cell Function	34	0.705	3	0.003	102	0.002	3
Nerve Regeneration	Cell Function	1	0.021	13	0.097	13	0.002	4
Cell division	Cell Function	22	0.456	5	0.003	110	0.001	5
Apoptosis	Cell Function	2	0.041	11	0.014	22	0.001	6
Phagocytosis	Cell Function	3	0.062	2	0.006	6	0	7
Cell Membrane Permeability	Cell Function	1	0.021	4	0.016	4	0	8
Mitosis	Cell Function	4	0.083	1	0.003	4	0	9
cell motility	Cell Function	3	0.062	1	0.003	3	0	10
Signal Transduction	Cell Function	4	0.083	2	0.002	8	0	11
Lymphocyte Activation	Cell Function	1	0.021	6	0.008	6	0	12
Cell Survival	Cell Function	2	0.041	1	0.001	2	0	13
