# Supplementary material for: Identification of biological pathways and genes associated with neurogenic heterotopic ossification by text mining
Source: PeerJ. 2020 Jan 3;8:e8276. doi: 10.7717/peerj.8276 (PMC6944123; doi:10.7717/peerj.8276)
Supplement: Supplemental Information 4 [file peerj-08-8276-s004.xls]

## Sheet: Sheet1
Table S12. Differentially expressed genes
Number of genes significant at 0.001 level of the univariate test: 290
Table 1 - Sorted by p-value of the univariate test.
Class 1: Health-MSCs (9 samples); Class 2: NHO-MSCs (7 samples).
The first 290 genes are significant at the nominal 0.001 level of the univariate test
																NO
	Parametric p-value	FDR	Geom mean of intensities in class 1	Geom mean of intensities in class 2	Fold-change	UniqueID	Anno-	Name	Accession	UGCluster	Symbol	Ensembl	MapLocation	DefinedGenelist		Symbol
							tations									ZNF771
1	< 1e-07	< 1e-07	10.28	32.69	0.31	43972	Info	zinc finger protein 771	NM_016643	Hs.148584	ZNF771	ENST00000434417	chr16:30429561-30429620			PCSK1N
2	< 1e-07	< 1e-07	14.25	96.63	0.15	21505	Info	proprotein convertase subtilisin/kexin type 1 inhibitor	NM_013271	Hs.522640	PCSK1N	ENST00000218230	chrX:48689796-48689737			ZNF775
3	< 1e-07	< 1e-07	13.81	93.93	0.15	33247	Info									AZIN1
4	< 1e-07	< 1e-07	20.94	92.04	0.23	28670	Info	zinc finger protein 775	NM_173680	Hs.655734	ZNF775	ENST00000329630	chr7:150094645-150094704			C14orf162
5	< 1e-07	< 1e-07	10.29	18.79	0.55	24035	Info	antizyme inhibitor 1	NM_015878	Hs.459106	AZIN1	ENST00000347770	chr8:103840434-103840375			C14orf43
6	< 1e-07	< 1e-07	26.05	10	2.61	24469	Info	chromosome 14 open reading frame 162	NR_024630	Hs.458319	C14orf162		chr14:70037055-70036996			SHC1
7	< 1e-07	< 1e-07	14.75	54.67	0.27	17466	Info	chromosome 14 open reading frame 43	NM_194278	Hs.594157	C14orf43	ENST00000286523	chr14:74185096-74185037			RP2
8	< 1e-07	< 1e-07	11.31	28.03	0.4	19410	Info									FTSJD2
9	< 1e-07	< 1e-07	1536.14	735.72	2.09	2766	Info						chr4:85414052-85414111			IFIT5
10	< 1e-07	< 1e-07	105.64	66.15	1.6	1221	Info	SHC (Src homology 2 domain containing) transforming protein 1	NM_003029	Hs.433795	SHC1	ENST00000368443	chr1:154935140-154935081	Angiotensin II mediated activation of JNK Pathway via Pyk2 dependent signaling, BCR Signaling Pathway, Bioactive Peptide Induced Signaling Pathway, Calcium Signaling by HBx of Hepatitis B virus, EGF Signaling Pathway, EPO Signaling Pathway, Erk and PI-3 K		SQLE
11	< 1e-07	< 1e-07	105.64	66.15	1.6	10258	Info	SHC (Src homology 2 domain containing) transforming protein 1	NM_003029	Hs.433795	SHC1	ENST00000368443	chr1:154935140-154935081	Angiotensin II mediated activation of JNK Pathway via Pyk2 dependent signaling, BCR Signaling Pathway, Bioactive Peptide Induced Signaling Pathway, Calcium Signaling by HBx of Hepatitis B virus, EGF Signaling Pathway, EPO Signaling Pathway, Erk and PI-3 K		ASAM
12	< 1e-07	< 1e-07	105.64	66.15	1.6	10652	Info	SHC (Src homology 2 domain containing) transforming protein 1	NM_003029	Hs.433795	SHC1	ENST00000368443	chr1:154935140-154935081	Angiotensin II mediated activation of JNK Pathway via Pyk2 dependent signaling, BCR Signaling Pathway, Bioactive Peptide Induced Signaling Pathway, Calcium Signaling by HBx of Hepatitis B virus, EGF Signaling Pathway, EPO Signaling Pathway, Erk and PI-3 K		GLRX2
13	< 1e-07	< 1e-07	105.64	66.15	1.6	12789	Info	SHC (Src homology 2 domain containing) transforming protein 1	NM_003029	Hs.433795	SHC1	ENST00000368443	chr1:154935140-154935081	Angiotensin II mediated activation of JNK Pathway via Pyk2 dependent signaling, BCR Signaling Pathway, Bioactive Peptide Induced Signaling Pathway, Calcium Signaling by HBx of Hepatitis B virus, EGF Signaling Pathway, EPO Signaling Pathway, Erk and PI-3 K		NR2F2
14	< 1e-07	< 1e-07	105.64	66.15	1.6	15832	Info	SHC (Src homology 2 domain containing) transforming protein 1	NM_003029	Hs.433795	SHC1	ENST00000368443	chr1:154935140-154935081	Angiotensin II mediated activation of JNK Pathway via Pyk2 dependent signaling, BCR Signaling Pathway, Bioactive Peptide Induced Signaling Pathway, Calcium Signaling by HBx of Hepatitis B virus, EGF Signaling Pathway, EPO Signaling Pathway, Erk and PI-3 K		TGFBR2
15	< 1e-07	< 1e-07	105.64	66.15	1.6	23332	Info	SHC (Src homology 2 domain containing) transforming protein 1	NM_003029	Hs.433795	SHC1	ENST00000368443	chr1:154935140-154935081	Angiotensin II mediated activation of JNK Pathway via Pyk2 dependent signaling, BCR Signaling Pathway, Bioactive Peptide Induced Signaling Pathway, Calcium Signaling by HBx of Hepatitis B virus, EGF Signaling Pathway, EPO Signaling Pathway, Erk and PI-3 K		TRO
16	< 1e-07	< 1e-07	105.64	66.15	1.6	25424	Info	SHC (Src homology 2 domain containing) transforming protein 1	NM_003029	Hs.433795	SHC1	ENST00000368443	chr1:154935140-154935081	Angiotensin II mediated activation of JNK Pathway via Pyk2 dependent signaling, BCR Signaling Pathway, Bioactive Peptide Induced Signaling Pathway, Calcium Signaling by HBx of Hepatitis B virus, EGF Signaling Pathway, EPO Signaling Pathway, Erk and PI-3 K		DHCR7
17	< 1e-07	< 1e-07	105.64	66.15	1.6	26510	Info	SHC (Src homology 2 domain containing) transforming protein 1	NM_003029	Hs.433795	SHC1	ENST00000368443	chr1:154935140-154935081	Angiotensin II mediated activation of JNK Pathway via Pyk2 dependent signaling, BCR Signaling Pathway, Bioactive Peptide Induced Signaling Pathway, Calcium Signaling by HBx of Hepatitis B virus, EGF Signaling Pathway, EPO Signaling Pathway, Erk and PI-3 K		GLTPD1
18	< 1e-07	< 1e-07	105.64	66.15	1.6	35981	Info	SHC (Src homology 2 domain containing) transforming protein 1	NM_003029	Hs.433795	SHC1	ENST00000368443	chr1:154935140-154935081	Angiotensin II mediated activation of JNK Pathway via Pyk2 dependent signaling, BCR Signaling Pathway, Bioactive Peptide Induced Signaling Pathway, Calcium Signaling by HBx of Hepatitis B virus, EGF Signaling Pathway, EPO Signaling Pathway, Erk and PI-3 K		GPNMB
19	< 1e-07	< 1e-07	105.64	66.15	1.6	40716	Info	SHC (Src homology 2 domain containing) transforming protein 1	NM_003029	Hs.433795	SHC1	ENST00000368443	chr1:154935140-154935081	Angiotensin II mediated activation of JNK Pathway via Pyk2 dependent signaling, BCR Signaling Pathway, Bioactive Peptide Induced Signaling Pathway, Calcium Signaling by HBx of Hepatitis B virus, EGF Signaling Pathway, EPO Signaling Pathway, Erk and PI-3 K		LOC100128942
20	< 1e-07	< 1e-07	10	17.29	0.58	28819	Info						chr2:223807603-223807658			NT5E
21	< 1e-07	7.23e-06	13.26	24.78	0.54	820	Info	retinitis pigmentosa 2 (X-linked recessive)	NM_006915	Hs.44766	RP2	ENST00000218340	chrX:46741667-46741726			MED10
22	< 1e-07	7.23e-06	656.53	287.39	2.28	23920	Info	FtsJ methyltransferase domain containing 2	AK000348	Hs.520102	FTSJD2		chr6:37429924-37429983			UBOX5
23	2e-07	1.27e-05	10.03	17.28	0.58	4090	Info	interferon-induced protein with tetratricopeptide repeats 5	NM_012420	Hs.252839	IFIT5	ENST00000371795	chr10:91179559-91179618			TMEM204
24	2e-07	1.27e-05	19.62	45.01	0.44	2651	Info	squalene epoxidase	NM_003129	Hs.71465	SQLE	ENST00000265896	chr8:126034443-126034502	Metabolic pathways, Steroid biosynthesis		NEUROG3
25	2e-07	1.27e-05	23.83	11.5	2.07	40361	Info	adipocyte-specific adhesion molecule	NM_024769	Hs.591949	ASAM	ENST00000299322	chr11:122944317-122944258			SREBF2
26	3e-07	1.7e-05	10.78	20.72	0.52	40996	Info	glutaredoxin 2	NM_016066	Hs.458283	GLRX2	ENST00000367440	chr1:193066821-193066762			PGM2
27	3e-07	1.7e-05	35.37	102.52	0.35	32832	Info	nuclear receptor subfamily 2, group F, member 2	NM_021005	Hs.657455	NR2F2	ENST00000332894	chr15:96881957-96882016			HRK
28	3e-07	1.7e-05	236.53	71.24	3.32	36543	Info	transforming growth factor, beta receptor II (70/80kDa)	NM_001024847	Hs.82028	TGFBR2	ENST00000295754	chr3:30735163-30735222	ALK in cardiac myocytes, CTCF: First Multivalent Nuclear Factor, NFkB activation by Nontypeable Hemophilus influenzae, Role of Tob in T-cell activation, TGF beta signaling pathway, Adherens junction, Chagas disease (American trypanosomiasis), Chronic myel		MGC10814
29	4e-07	2.19e-05	32.55	18.07	1.8	18228	Info	trophinin	NM_016157	Hs.633653	TRO	ENST00000442530	chrX:54957644-54957703			HMGCR
30	5e-07	2.41e-05	19.67	42.83	0.46	7989	Info	7-dehydrocholesterol reductase	NM_001360	Hs.503134	DHCR7	ENST00000407721	chr11:71145573-71145514	Metabolic pathways, Steroid biosynthesis		PTS
31	5e-07	2.41e-05	30.23	10.98	2.75	18946	Info	glycolipid transfer protein domain containing 1	NM_001029885	Hs.515689	GLTPD1	ENST00000343938	chr1:1263789-1263848			EFNB3
32	5e-07	2.41e-05	27.04	106.78	0.25	12235	Info	glycoprotein (transmembrane) nmb	NM_001005340	Hs.190495	GPNMB	ENST00000435486	chr7:23314496-23314555			ADAMTS7
33	5e-07	2.41e-05	14.92	32.52	0.46	20638	Info	hypothetical protein LOC100128942	AK128457	Hs.640074	LOC100128942	ENST00000374945	chr17:76259455-76259396			WSB1
34	6e-07	2.73e-05	85.06	34.54	2.46	24844	Info	5'-nucleotidase, ecto (CD73)	NM_002526	Hs.153952	NT5E	ENST00000369651	chr6:86204891-86204950	Metabolic pathways, Nicotinate and nicotinamide metabolism, Purine metabolism, Pyrimidine metabolism		FADS1
35	6e-07	2.73e-05	10.15	15.77	0.64	25755	Info	mediator complex subunit 10	NM_032286	Hs.13885	MED10	ENST00000255764	chr5:6374450-6372669			INHBA
36	7e-07	3.01e-05	11.09	22.49	0.49	7586	Info									SEPX1
37	7e-07	3.01e-05	46.94	99.96	0.47	19009	Info		DB229023	Hs.716063			chr1:201476464-201476523			BOK
38	8e-07	3.26e-05	909.61	478.98	1.9	27508	Info	U-box domain containing 5	NM_014948	Hs.654646	UBOX5	ENST00000217173	chr20:3088958-3088899	Ubiquitin mediated proteolysis		ACOT1
39	8e-07	3.26e-05	19.06	55.15	0.35	27869	Info	transmembrane protein 204	BC004932	Hs.459652	TMEM204	ENST00000253934	chr16:1605486-1605545			SMYD3
40	1e-06	3.98e-05	40.7	11.26	3.61	17068	Info	neurogenin 3	NM_020999	Hs.532682	NEUROG3	ENST00000242462	chr10:71331866-71331807	Maturity onset diabetes of the young		MARCKS
41	1.3e-06	4.92e-05	1003.67	455.84	2.2	39509	Info									KCNN4
42	1.3e-06	4.92e-05	12.35	23.12	0.53	22093	Info	sterol regulatory element binding transcription factor 2	NM_004599	Hs.443258	SREBF2	ENST00000457567	chr22:42302199-42302258	SREBP control of lipid synthesis		SDC4
43	1.8e-06	6.51e-05	10.46	17.29	0.6	39576	Info	phosphoglucomutase 2	NM_018290	Hs.23363	PGM2	ENST00000381967	chr4:37863548-37863607	Amino sugar and nucleotide sugar metabolism, Galactose metabolism, Glycolysis / Gluconeogenesis, Metabolic pathways, Pentose phosphate pathway, Purine metabolism, Starch and sucrose metabolism		SCARA3
44	1.8e-06	6.51e-05	125.54	44.63	2.81	3367	Info									CPT1C
45	2.2e-06	7.78e-05	50.52	116.2	0.43	16095	Info	harakiri, BCL2 interacting protein (contains only BH3 domain)	NM_003806	Hs.87247	HRK	ENST00000257572	chr12:117319029-117318970			HSPA13
46	2.3e-06	7.79e-05	10.55	27.2	0.39	42855	Info		BX648200	Hs.511979			chr7:97844617-97844676			TANC1
47	2.3e-06	7.79e-05	12.44	24.73	0.5	4880	Info		BF510844	Hs.649370			chr7:151652629-151652688			ZKSCAN1
48	2.4e-06	7.96e-05	1122.55	603.44	1.86	26934	Info	hypothetical protein MGC10814	BC004943	Hs.679519	MGC10814		chr19:18992197-18992138			ACOT2
49	2.6e-06	8.44e-05	11.69	24.02	0.49	28761	Info	3-hydroxy-3-methylglutaryl-Coenzyme A reductase	NM_000859	Hs.628096	HMGCR	ENST00000343975	chr5:74657651-74657710	Bile secretion, Metabolic pathways, Terpenoid backbone biosynthesis		CHI3L1
50	2.8e-06	8.57e-05	41.69	74.09	0.56	7799	Info	6-pyruvoyltetrahydropterin synthase	NM_000317	Hs.503860	PTS	ENST00000280362	chr11:112104258-112104317	Folate biosynthesis, Metabolic pathways		C21orf34
51	2.8e-06	8.57e-05	10	16.2	0.62	32137	Info	ephrin-B3	NM_001406	Hs.26988	EFNB3	ENST00000226091	chr17:7611348-7611407	Axon guidance		LRRC32
52	2.8e-06	8.57e-05	283.68	157.55	1.8	22899	Info		AB019564	Hs.666077			chrM:000001851-000001910			SDC2
53	3.2e-06	9.61e-05	154.75	82.41	1.88	6625	Info	ADAM metallopeptidase with thrombospondin type 1 motif, 7	NM_014272	Hs.16441	ADAMTS7	ENST00000258883	chr15:79051849-79051790			FADS2
54	3.3e-06	9.66e-05	22.37	12.46	1.8	12777	Info		BE300169	Hs.719417			chr19:49993745-49993510			LY96
55	3.4e-06	9.66e-05	86.65	42.04	2.06	623	Info	WD repeat and SOCS box-containing 1	NM_015626	Hs.446017	WSB1	ENST00000348811	chr17:25639668-25639727			TRAF5
56	3.4e-06	9.66e-05	20.82	50.93	0.41	8189	Info	fatty acid desaturase 1	NM_013402	Hs.503546	FADS1	ENST00000350997	chr11:61567185-61567126	Biosynthesis of unsaturated fatty acids		TMEM138
57	3.6e-06	0.0001	63.88	34.73	1.84	40628	Info		BQ614035	Hs.433529			chr19:50001244-50001185			DHCR24
58	3.9e-06	0.000107	149.32	68.08	2.19	20934	Info	adipocyte-specific adhesion molecule	NM_024769	Hs.591949	ASAM	ENST00000299322	chr11:122943288-122943229			RGS3
59	4.6e-06	0.000124	437.3	835.98	0.52	23278	Info									FYCO1
60	5e-06	0.000133	21.29	11.23	1.9	33374	Info						chr14:50052752-50053046			TSPAN10
61	5.3e-06	0.000138	28.05	56.95	0.49	16576	Info						chr10:72183672-72183731			SREBF1
62	5.4e-06	0.000139	12.41	36.02	0.34	5980	Info	inhibin, beta A	AK001903	Hs.28792	INHBA	ENST00000242208	chr7:41725272-41725213	Cytokine-cytokine receptor interaction, TGF-beta signaling pathway		GREM2
63	5.6e-06	0.000141	10	20.77	0.48	31123	Info		XM_001716786	Hs.649249		ENST00000369123	chr6:105388387-105388328			ORAI1
64	6e-06	0.000149	10.18	18.69	0.54	18892	Info	selenoprotein X, 1	NM_016332	Hs.655346	SEPX1	ENST00000361871	chr16:1991299-1990876			EVI2A
65	7e-06	0.000171	14.89	33.93	0.44	378	Info	BCL2-related ovarian killer	NM_032515	Hs.293753	BOK	ENST00000318407	chr2:242513018-242513077			ORC6L
66	7.2e-06	0.000174	59.12	103.81	0.57	20062	Info	acyl-CoA thioesterase 1	NM_001037161	Hs.568046	ACOT1	ENST00000311148	chr14:74010384-74010443	Biosynthesis of unsaturated fatty acids		ZNF575
67	7.9e-06	0.000188	39.86	144.87	0.28	15842	Info	SET and MYND domain containing 3	NM_022743	Hs.567571	SMYD3	ENST00000327801	chr1:245912856-245912797			ANKRD37
68	8.5e-06	0.000199	387.85	723.44	0.54	1369	Info	myristoylated alanine-rich protein kinase C substrate	NM_002356	Hs.519909	MARCKS	ENST00000368635	chr6:114182911-114182970	Effects of calcineurin in Keratinocyte Differentiation, Fc gamma R-mediated phagocytosis		PLAU
69	8.7e-06	0.000201	49.31	12.87	3.83	31175	Info	potassium intermediate/small conductance calcium-activated channel, subfamily N, member 4	NM_002250	Hs.10082	KCNN4	ENST00000407385	chr19:44270995-44270936	Protein digestion and absorption, Salivary secretion		DUSP6
70	9e-06	0.000205	75.5	37.13	2.03	21705	Info	syndecan 4	NM_002999	Hs.632267	SDC4	ENST00000372733	chr20:43954637-43954578	Cell adhesion molecules (CAMs), ECM-receptor interaction, Malaria		BAMBI
71	9.4e-06	0.000211	90.17	41.96	2.15	18836	Info	scavenger receptor class A, member 3	NM_016240	Hs.128856	SCARA3	ENST00000301904	chr8:27530383-27530442			PHLDA2
72	1.05e-05	0.000232	45.05	21.48	2.1	38155	Info	carnitine palmitoyltransferase 1C	NM_152359	Hs.112195	CPT1C	ENST00000405931	chr19:50216881-50216940	Adipocytokine signaling pathway, Fatty acid degradation, PPAR signaling pathway		LIPA
73	1.09e-05	0.000238	19.63	37.48	0.52	15826	Info	selenoprotein X, 1	NM_016332	Hs.655346	SEPX1	ENST00000361871	chr16:1988536-1988477			KISS1R
74	1.11e-05	0.000239	19.52	33.17	0.59	8449	Info	heat shock protein 70kDa family, member 13	NM_006948	Hs.352341	HSPA13	ENST00000285667	chr21:15743635-15743576			RCL1
75	1.18e-05	0.00025	13.35	22.4	0.6	34637	Info						chr7:79100210-79100269			OSTM1
76	1.2e-05	0.000251	14.02	25	0.56	14979	Info	tetratricopeptide repeat, ankyrin repeat and coiled-coil containing 1	NM_033394	Hs.61590	TANC1	ENST00000454300	chr2:160089090-160089149			PTGDS
77	1.37e-05	0.000281	296.83	130	2.28	42345	Info	zinc finger with KRAB and SCAN domains 1	AY260738	Hs.615360	ZKSCAN1		chr7:99622179-99622238			PRR11
78	1.38e-05	0.000281	51.14	93.97	0.54	19163	Info	acyl-CoA thioesterase 2	NM_006821	Hs.446685	ACOT2	ENST00000238651	chr14:74042253-74042312	Biosynthesis of unsaturated fatty acids		VEGFB
79	1.42e-05	0.000286	113.34	50	2.27	37954	Info		BC089451	Hs.44098			chr11:121899113-121899054			C6orf62
80	1.51e-05	0.0003	832.54	81.32	10.24	35696	Info	chitinase 3-like 1 (cartilage glycoprotein-39)	NM_001276	Hs.382202	CHI3L1	ENST00000404436	chr1:203148255-203148196	Amino sugar and nucleotide sugar metabolism		MEG3
81	1.68e-05	0.000328	18.6	10.13	1.84	7768	Info	chromosome 21 open reading frame 34	NR_027790	Hs.473394	C21orf34	ENST00000308787	chr21:17979346-17979405			GDF15
82	1.69e-05	0.000328	11.43	27.5	0.42	7939	Info	leucine rich repeat containing 32	NM_005512	Hs.151641	LRRC32	ENST00000404995	chr11:76369017-76368958			SEC11C
83	1.75e-05	0.000335	20.12	37.58	0.54	18665	Info	syndecan 2	NM_002998	Hs.1501	SDC2	ENST00000302190	chr8:97614728-97620593	Cell adhesion molecules (CAMs), ECM-receptor interaction, Malaria		THSD1
84	1.98e-05	0.000375	18.09	95.02	0.19	16745	Info	fatty acid desaturase 2	NM_004265	Hs.502745	FADS2	ENST00000278840	chr11:61634754-61634813	alpha-Linolenic acid metabolism, Biosynthesis of unsaturated fatty acids, PPAR signaling pathway		ANKRD17
85	2.03e-05	0.000376	12.27	23.02	0.53	43935	Info	lymphocyte antigen 96	NM_015364	Hs.660766	LY96	ENST00000284818	chr8:74941211-74941270	Pathogenic Escherichia coli infection, Toll-like receptor signaling pathway, Toxoplasmosis		EIF4A2
86	2.03e-05	0.000376	155.71	13.23	11.77	37675	Info	chitinase 3-like 1 (cartilage glycoprotein-39)	NM_001276	Hs.382202	CHI3L1	ENST00000447859	chr1:203152800-203151953	Amino sugar and nucleotide sugar metabolism		RBPJ
87	2.17e-05	0.000397	25.08	10.59	2.37	40027	Info		AF300871			ENST00000402782	chr8:36746755-36746814			SPCS3
88	2.66e-05	0.000481	84.6	362.57	0.23	9589	Info						chrUn_gl000220:000109669-000109610			NUAK1
89	2.75e-05	0.000492	12.27	25.77	0.48	32802	Info	TNF receptor-associated factor 5	NM_004619	Hs.523930	TRAF5	ENST00000427925	chr1:211548188-211548247	Pathways in cancer, Small cell lung cancer		SLC20A1
90	2.88e-05	0.000509	11.43	19.69	0.58	18704	Info	transmembrane protein 138	NM_016464	Hs.406530	TMEM138	ENST00000278826	chr11:61136153-61136212			HIPK2
91	3.1e-05	0.000542	10	15.15	0.66	22483	Info	24-dehydrocholesterol reductase	NM_014762	Hs.498727	DHCR24	ENST00000371269	chr1:55315569-55315510	Metabolic pathways, Steroid biosynthesis		LRP1
92	3.31e-05	0.000568	84.03	36.23	2.32	10181	Info	regulator of G-protein signaling 3	NM_134427	Hs.494875	RGS3	ENST00000350696	chr9:116359708-116359767	Axon guidance		PDGFRA
93	3.32e-05	0.000568	22.72	12.65	1.8	30277	Info	FYVE and coiled-coil domain containing 1	NM_024513	Hs.200227	FYCO1	ENST00000296137	chr3:45959650-45959591			FOXC1
94	3.48e-05	0.000589	318.39	191.48	1.66	24268	Info	tetraspanin 10	NM_031945	Hs.208219	TSPAN10	ENST00000328585	chr17:79615472-79615531			LTBP2
95	3.61e-05	0.000605	75.31	174.14	0.43	41062	Info	sterol regulatory element binding transcription factor 1	NM_001005291	Hs.592123	SREBF1	ENST00000355815	chr17:17715478-17715419	SREBP control of lipid synthesis, Insulin signaling pathway		CUL9
96	3.97e-05	0.000658	38.42	132.41	0.29	41409	Info	gremlin 2, cysteine knot superfamily, homolog (Xenopus laevis)	NM_022469	Hs.98206	GREM2	ENST00000318160	chr1:240654036-240653977			SPON2
97	4.01e-05	0.000658	96.16	50.94	1.89	27924	Info						chr17:27047754-27047019			LIMS2
98	4.37e-05	0.000709	702.71	349.34	2.01	410	Info	ORAI calcium release-activated calcium modulator 1	AK027372	Hs.55148	ORAI1		chr12:122080078-122080137			MXD4
99	4.55e-05	0.000724	10	22.47	0.45	42535	Info	ecotropic viral integration site 2A	NM_001003927	Hs.591198	EVI2A	ENST00000394755	chr17:29645461-29645402			EMP2
100	4.55e-05	0.000724	109.88	48.29	2.28	26840	Info	origin recognition complex, subunit 6 like (yeast)	NM_014321	Hs.49760	ORC6L	ENST00000219097	chr16:46732004-46732063			MYO1C
101	4.74e-05	0.000747	52.13	21.05	2.48	30228	Info	zinc finger protein 575	NM_174945	Hs.213534	ZNF575	ENST00000314228	chr19:44039329-44039388			C5orf62
102	5.23e-05	0.000747	16.12	43.89	0.37	42945	Info	ankyrin repeat domain 37	NM_181726	Hs.508154	ANKRD37	ENST00000335174	chr4:186321293-186321352			LDLR
103	5.26e-05	0.000747	266.31	81.17	3.28	7649	Info	plasminogen activator, urokinase	NM_002658	Hs.77274	PLAU	ENST00000446342	chr10:75677050-75677109	Fibrinolysis Pathway, Platelet Amyloid Precursor Protein Pathway, Complement and coagulation cascades		HS6ST1
104	5.26e-05	0.000747	266.31	81.17	3.28	9805	Info	plasminogen activator, urokinase	NM_002658	Hs.77274	PLAU	ENST00000446342	chr10:75677050-75677109	Fibrinolysis Pathway, Platelet Amyloid Precursor Protein Pathway, Complement and coagulation cascades		LOC375295
105	5.26e-05	0.000747	266.31	81.17	3.28	11043	Info	plasminogen activator, urokinase	NM_002658	Hs.77274	PLAU	ENST00000446342	chr10:75677050-75677109	Fibrinolysis Pathway, Platelet Amyloid Precursor Protein Pathway, Complement and coagulation cascades		FBLN1
106	5.26e-05	0.000747	266.31	81.17	3.28	14920	Info	plasminogen activator, urokinase	NM_002658	Hs.77274	PLAU	ENST00000446342	chr10:75677050-75677109	Fibrinolysis Pathway, Platelet Amyloid Precursor Protein Pathway, Complement and coagulation cascades		SAT1
107	5.26e-05	0.000747	266.31	81.17	3.28	20435	Info	plasminogen activator, urokinase	NM_002658	Hs.77274	PLAU	ENST00000446342	chr10:75677050-75677109	Fibrinolysis Pathway, Platelet Amyloid Precursor Protein Pathway, Complement and coagulation cascades		SCARB1
108	5.26e-05	0.000747	266.31	81.17	3.28	22948	Info	plasminogen activator, urokinase	NM_002658	Hs.77274	PLAU	ENST00000446342	chr10:75677050-75677109	Fibrinolysis Pathway, Platelet Amyloid Precursor Protein Pathway, Complement and coagulation cascades		GOLM1
109	5.26e-05	0.000747	266.31	81.17	3.28	28681	Info	plasminogen activator, urokinase	NM_002658	Hs.77274	PLAU	ENST00000446342	chr10:75677050-75677109	Fibrinolysis Pathway, Platelet Amyloid Precursor Protein Pathway, Complement and coagulation cascades		STAG3L1
110	5.26e-05	0.000747	266.31	81.17	3.28	29672	Info	plasminogen activator, urokinase	NM_002658	Hs.77274	PLAU	ENST00000446342	chr10:75677050-75677109	Fibrinolysis Pathway, Platelet Amyloid Precursor Protein Pathway, Complement and coagulation cascades		LAMA4
111	5.26e-05	0.000747	266.31	81.17	3.28	35388	Info	plasminogen activator, urokinase	NM_002658	Hs.77274	PLAU	ENST00000446342	chr10:75677050-75677109	Fibrinolysis Pathway, Platelet Amyloid Precursor Protein Pathway, Complement and coagulation cascades		FAM20C
112	5.26e-05	0.000747	266.31	81.17	3.28	39882	Info	plasminogen activator, urokinase	NM_002658	Hs.77274	PLAU	ENST00000446342	chr10:75677050-75677109	Fibrinolysis Pathway, Platelet Amyloid Precursor Protein Pathway, Complement and coagulation cascades		STX1A
113	5.58e-05	0.000786	69.72	25.72	2.71	40439	Info	dual specificity phosphatase 6	NM_001946	Hs.298654	DUSP6	ENST00000279488	chr12:89742203-89742144	Regulation of MAP Kinase Pathways Through Dual Specificity Phosphatases, MAPK signaling pathway		LOC641298
114	5.92e-05	0.000826	37.81	103.99	0.36	21712	Info	BMP and activin membrane-bound inhibitor homolog (Xenopus laevis)	NM_012342	Hs.533336	BAMBI	ENST00000375533	chr10:28971551-28971610			PDIA5
115	6.51e-05	0.000901	38.23	68.4	0.56	3873	Info	pleckstrin homology-like domain, family A, member 2	NM_003311	Hs.154036	PHLDA2	ENST00000314222	chr11:2949755-2949696			CFH
116	6.71e-05	0.00092	31.92	58.53	0.55	19171	Info	lipase A, lysosomal acid, cholesterol esterase	NM_000235	Hs.643030	LIPA	ENST00000456827	chr10:90973457-90973398	Lysosome, Steroid biosynthesis		ERRFI1
117	6.94e-05	0.000937	30.6	11.96	2.56	19788	Info	KISS1 receptor	NM_032551	Hs.208229	KISS1R	ENST00000234371	chr19:920619-920678	Neuroactive ligand-receptor interaction		ZNF609
118	6.95e-05	0.000937	26.01	13.51	1.93	36210	Info	RNA terminal phosphate cyclase-like 1	NM_005772	Hs.194121	RCL1	ENST00000381750	chr9:4860885-4860943	Ribosome biogenesis in eukaryotes		GLCCI1
119	7.01e-05	0.000937	24.45	41.47	0.59	30082	Info	osteopetrosis associated transmembrane protein 1	NM_014028	Hs.226780	OSTM1	ENST00000193322	chr6:108364515-108364456			STEAP1
120	7.26e-05	0.000957	19.4	206.21	0.094	35935	Info	prostaglandin D2 synthase 21kDa (brain)	NM_000954	Hs.446429	PTGDS	ENST00000371625	chr9:139876130-139876189	Arachidonic acid metabolism, Metabolic pathways		ANKK1
121	7.31e-05	0.000957	83.73	38.74	2.16	8729	Info	proline rich 11	AK001891	Hs.631750	PRR11		chr17:57281935-57281994			SOX8
122	7.41e-05	0.000957	121.44	209.25	0.58	21628	Info	vascular endothelial growth factor B	NM_003377	Hs.78781	VEGFB	ENST00000309422	chr11:64006111-64006170	Bladder cancer, Cytokine-cytokine receptor interaction, Focal adhesion, mTOR signaling pathway, Pancreatic cancer, Pathways in cancer, Renal cell carcinoma, Rheumatoid arthritis		MAVS
123	7.41e-05	0.000957	11.97	22.41	0.53	43210	Info	chromosome 6 open reading frame 62	NM_030939	Hs.519930	C6orf62	ENST00000378102	chr6:24716487-24716428			CITED4
124	7.46e-05	0.000957	23.33	13.09	1.78	41276	Info	maternally expressed 3 (non-protein coding)	NR_002766	Hs.525589	MEG3		chr14:101295974-101296033			CCL2
125	8.09e-05	0.00103	159.53	404.51	0.39	43287	Info	growth differentiation factor 15	NM_004864	Hs.616962	GDF15	ENST00000252809	chr19:18499890-18499949			ACAT2
126	8.87e-05	0.00111	35.38	73.74	0.48	25673	Info		AF126109	Hs.461187			chr16:70280809-70280750			ADRA2C
127	8.9e-05	0.00111	27.7	10	2.77	31870	Info		BC034271				chr9:97885730-97885790			BNC2
128	9e-05	0.00111	20.43	34.19	0.6	20518	Info	SEC11 homolog C (S. cerevisiae)	NM_033280	Hs.45107	SEC11C	ENST00000299714	chr18:56824892-56825917	Protein export		IMPA2
129	9.02e-05	0.00111	53.54	34.3	1.56	26201	Info	thrombospondin, type I, domain containing 1	NM_018676	Hs.325667	THSD1	ENST00000258613	chr13:52951493-52951434			DBNDD2
130	9.12e-05	0.00111	23.23	14.02	1.66	32455	Info	ankyrin repeat domain 17	NM_032217	Hs.601206	ANKRD17	ENST00000358602	chr4:73984446-73981616			FLJ23867
131	9.12e-05	0.00111	28.64	69.76	0.41	26035	Info	nuclear receptor subfamily 2, group F, member 2	NM_021005	Hs.657455	NR2F2	ENST00000332894	chr15:96877802-96880605			LEPREL1
132	9.33e-05	0.00112	14.63	25.02	0.58	7865	Info	eukaryotic translation initiation factor 4A2	NM_001967	Hs.518475	EIF4A2	ENST00000429589	chr10:074960130-074960189	Eukaryotic protein translation, Internal Ribosome entry pathway, mTOR Signaling Pathway, Regulation of eIF4e and p70 S6 Kinase, RNA transport		PDZD7
133	9.33e-05	0.00112	54.76	22.49	2.44	38762	Info	recombination signal binding protein for immunoglobulin kappa J region	D14041		RBPJ		chr4:026436190-026436250	Presenilin action in Notch and Wnt signaling, Proteolysis and Signaling Pathway of Notch , Segmentation Clock, Notch signaling pathway		APLP2
134	9.89e-05	0.00117	42.61	102.58	0.42	13219	Info	signal peptidase complex subunit 3 homolog (S. cerevisiae)	NM_021928	Hs.42194	SPCS3	ENST00000264597	chr4:177249358-177249417	Protein export		CLU
135	0.0001002	0.00117	24.7	85.9	0.29	10454	Info	NUAK family, SNF1-like kinase, 1	NM_014840	Hs.524692	NUAK1	ENST00000261402	chr12:106457605-106457546			IFIT1
136	0.0001003	0.00117	356.15	194.65	1.83	26361	Info	solute carrier family 20 (phosphate transporter), member 1	NM_005415	Hs.187946	SLC20A1	ENST00000409095	chr2:113421288-113421347			BICC1
137	0.0001045	0.00119	35.57	16.37	2.17	38125	Info	homeodomain interacting protein kinase 2	NM_022740	Hs.397465	HIPK2	ENST00000428878	chr7:139257443-139257384			LTBP1
138	0.0001096	0.00119	34.93	20.15	1.73	482	Info	low density lipoprotein receptor-related protein 1	NM_002332	Hs.162757	LRP1	ENST00000243077	chr12:57605946-57606005	Alzheimer's disease, Malaria		ILDR1
139	0.0001096	0.00119	34.93	20.15	1.73	12355	Info	low density lipoprotein receptor-related protein 1	NM_002332	Hs.162757	LRP1	ENST00000243077	chr12:57605946-57606005	Alzheimer's disease, Malaria		SLC2A8
140	0.0001096	0.00119	34.93	20.15	1.73	22103	Info	low density lipoprotein receptor-related protein 1	NM_002332	Hs.162757	LRP1	ENST00000243077	chr12:57605946-57606005	Alzheimer's disease, Malaria		HSD17B11
141	0.0001096	0.00119	34.93	20.15	1.73	22658	Info	low density lipoprotein receptor-related protein 1	NM_002332	Hs.162757	LRP1	ENST00000243077	chr12:57605946-57606005	Alzheimer's disease, Malaria		NFIB
142	0.0001096	0.00119	34.93	20.15	1.73	24836	Info	low density lipoprotein receptor-related protein 1	NM_002332	Hs.162757	LRP1	ENST00000243077	chr12:57605946-57606005	Alzheimer's disease, Malaria		SLC39A7
143	0.0001096	0.00119	34.93	20.15	1.73	27329	Info	low density lipoprotein receptor-related protein 1	NM_002332	Hs.162757	LRP1	ENST00000243077	chr12:57605946-57606005	Alzheimer's disease, Malaria		FN1
144	0.0001096	0.00119	34.93	20.15	1.73	29313	Info	low density lipoprotein receptor-related protein 1	NM_002332	Hs.162757	LRP1	ENST00000243077	chr12:57605946-57606005	Alzheimer's disease, Malaria		MC1R
145	0.0001096	0.00119	34.93	20.15	1.73	32239	Info	low density lipoprotein receptor-related protein 1	NM_002332	Hs.162757	LRP1	ENST00000243077	chr12:57605946-57606005	Alzheimer's disease, Malaria		REEP2
146	0.0001096	0.00119	34.93	20.15	1.73	38413	Info	low density lipoprotein receptor-related protein 1	NM_002332	Hs.162757	LRP1	ENST00000243077	chr12:57605946-57606005	Alzheimer's disease, Malaria		C9orf167
147	0.0001096	0.00119	34.93	20.15	1.73	43062	Info	low density lipoprotein receptor-related protein 1	NM_002332	Hs.162757	LRP1	ENST00000243077	chr12:57605946-57606005	Alzheimer's disease, Malaria		NKX1-2
148	0.0001113	0.0012	18.83	10.32	1.83	22962	Info	platelet-derived growth factor receptor, alpha polypeptide	AA599881	Hs.74615	PDGFRA		chr4:055162615-055162556	CBL mediated ligand-induced downregulation of EGF receptors, Erk1/Erk2 Mapk Signaling pathway, PDGF Signaling Pathway, Phospholipids as signalling intermediaries, Rac 1 cell motility signaling pathway, Role of PI3K subunit p85 in regulation of Actin Organ		COL8A1
149	0.0001133	0.0012	502.78	211.22	2.38	13668	Info	forkhead box C1	NM_001453	Hs.348883	FOXC1	ENST00000380874	chr6:1612280-1612339			GGT6
150	0.0001135	0.0012	896.41	458.91	1.95	1521	Info						chr12:132428555-132428614			FJX1
151	0.0001144	0.00121	45.79	22.58	2.03	6970	Info	latent transforming growth factor beta binding protein 2	NM_000428	Hs.512776	LTBP2	ENST00000261978	chr14:74965429-74965370			SLC35E4
152	0.0001162	0.00122	52.26	30.34	1.72	28009	Info	cullin 9	NM_015089	Hs.485434	CUL9	ENST00000372647	chr6:43192245-43192304			ZNF469
153	0.0001169	0.00122	64.06	33.19	1.93	12327	Info		CR615613				chr1:569875-569934			SNED1
154	0.0001194	0.00123	65.02	278.65	0.23	20991	Info	spondin 2, extracellular matrix protein	NM_012445	Hs.635350	SPON2	ENST00000431380	chr4:1160797-1160738			KLC3
155	0.0001196	0.00123	13.75	29.33	0.47	40979	Info	LIM and senescent cell antigen-like domains 2	NM_017980	Hs.469881	LIMS2	ENST00000410038	chr2:128396293-128396234			RBMS1
156	0.0001208	0.00123	10	17.42	0.57	10867	Info	gremlin 2, cysteine knot superfamily, homolog (Xenopus laevis)	NM_022469	Hs.98206	GREM2	ENST00000318160	chr1:240653460-240653401			CGREF1
157	0.0001219	0.00124	24.46	12.29	1.99	19304	Info	MAX dimerization protein 4	NM_006454	Hs.655020	MXD4	ENST00000337190	chr4:2251339-2251280			KCNQ1OT1
158	0.0001243	0.00125	41.25	17.1	2.41	2668	Info		U69195	Hs.527484			chr9:65974319-65974378			SLC9A3R1
159	0.0001258	0.00126	91.4	45.11	2.03	6593	Info	epithelial membrane protein 2	NM_001424	Hs.531561	EMP2	ENST00000359543	chr16:10626759-10626700			PDCL3
160	0.0001313	0.00131	507.49	291.2	1.74	28322	Info	myosin IC	NM_033375	Hs.286226	MYO1C	ENST00000361007	chr17:1368434-1368375			NPTN
161	0.0001333	0.00131	102.65	54.95	1.87	5434	Info	chromosome 5 open reading frame 62	NM_032947	Hs.29444	C5orf62		chr5:150176190-150176249			ZNF395
162	0.0001337	0.00131	32.22	82.49	0.39	34680	Info	low density lipoprotein receptor	NM_000527	Hs.213289	LDLR	ENST00000252444	chr19:11244293-11244352	FXR and LXR Regulation of Cholesterol Metabolism, Low-density lipoprotein (LDL) pathway during atherogenesis, SREBP control of lipid synthesis, Bile secretion, Endocytosis, Hepatitis C, Toxoplasmosis		TNK2
163	0.0001372	0.00134	29.38	64.5	0.46	3051	Info	heparan sulfate 6-O-sulfotransferase 1	NM_004807	Hs.512841	HS6ST1	ENST00000259241	chr2:129023118-129023059	Glycosaminoglycan biosynthesis - heparan sulfate / heparin		C1orf198
164	0.0001379	0.00134	13.66	32.01	0.43	9256	Info	hypothetical protein LOC375295	BC013438	Hs.659070	LOC375295		chr2:177494832-177494773			MKNK2
165	0.0001412	0.00136	47.33	10.87	4.35	23956	Info	fibulin 1	NM_001996	Hs.24601	FBLN1	ENST00000396034	chr22:45939377-45942994			EBP
166	0.0001476	0.00141	110.23	48.25	2.28	5745	Info	spermidine/spermine N1-acetyltransferase 1	NM_002970	Hs.28491	SAT1	ENST00000379254	chrX:23803466-23803525	Arginine and proline metabolism, Metabolic pathways		TBC1D3F
167	0.0001587	0.00151	339.17	174.4	1.94	26811	Info						chr2:166603613-166603554			CYP3A5
168	0.0001597	0.00151	26.81	52.61	0.51	15945	Info	scavenger receptor class B, member 1	NM_005505	Hs.709216	SCARB1	ENST00000261693	chr12:125262284-125262225	Bile secretion, Fat digestion and absorption, Hepatitis C, Phagosome, Vitamin digestion and absorption		IGFBP2
169	0.0001647	0.00155	26.6	13.24	2.01	40589	Info	golgi membrane protein 1	NM_016548	Hs.494337	GOLM1	ENST00000376023	chr9:88641621-88641562			ALPK1
170	0.0001688	0.00158	24.73	13.79	1.79	29034	Info		AI523154	Hs.706842			chr1:154916912-154916971			CYP1A2
171	0.0001716	0.0016	792.69	443.8	1.79	45124	Info									GPC6
172	0.0001727	0.0016	45.12	20.28	2.22	36410	Info	stromal antigen 3-like 1	NM_018991	Hs.632310	STAG3L1	ENST00000339898	chr7:74996261-74996320			MRPS6
173	0.0001902	0.00175	289.69	132.61	2.18	37502	Info	laminin, alpha 4	NM_002290	Hs.654572	LAMA4	ENST00000230538	chr6:112430549-112430490	Agrin in Postsynaptic Differentiation, African trypanosomiasis, Amoebiasis, ECM-receptor interaction, Focal adhesion, Pathways in cancer, Small cell lung cancer, Toxoplasmosis		INE1
174	0.0001961	0.00178	261.95	101.95	2.57	22969	Info	family with sequence similarity 20, member C	NM_020223	Hs.134742	FAM20C	ENST00000313766	chr7:300381-300440			QSOX1
175	0.0001974	0.00178	36.09	17.85	2.02	35878	Info	latent transforming growth factor beta binding protein 2	NM_000428	Hs.512776	LTBP2	ENST00000261978	chr14:74965511-74965452			PPP1R3B
176	0.0001974	0.00178	33.94	21.13	1.61	35171	Info									PXN
177	0.0002	0.0018	19.95	10.86	1.84	25188	Info	syntaxin 1A (brain)	NM_004603	Hs.647024	STX1A	ENST00000428377	chr7:73113602-73113543	Blockade of Neurotransmitter Relase by Botulinum Toxin, SNARE interactions in vesicular transport		ALDH4A1
178	0.0002017	0.0018	10	14.52	0.69	22409	Info	SMG1 homolog, phosphatidylinositol 3-kinase-related kinase pseudogene	AL834164	Hs.552700	LOC641298	ENST00000453785	chr16:22477119-22477178			NEUROG1
179	0.0002045	0.00182	96.27	49.95	1.93	38297	Info	protein disulfide isomerase family A, member 5	NM_006810	Hs.477352	PDIA5	ENST00000448706	chr3:122880268-122880751			CRY2
180	0.000209	0.00184	153.02	55.07	2.78	43956	Info	complement factor H	NM_000186	Hs.363396	CFH	ENST00000367429	chr1:196716550-196716609	Complement and coagulation cascades, Staphylococcus aureus infection		KRT18
181	0.000209	0.00184	64.65	27.55	2.35	40301	Info	forkhead box C1	NM_001453	Hs.348883	FOXC1	ENST00000380874	chr6:1613858-1613917			AK1
182	0.0002116	0.00185	202.29	90.96	2.22	28683	Info									SSPN
183	0.0002168	0.00188	304.57	139.43	2.18	17647	Info	ERBB receptor feedback inhibitor 1	NM_018948	Hs.605445	ERRFI1	ENST00000377482	chr1:8072267-8072208			TLE1
184	0.0002265	0.00196	35.16	19.97	1.76	33231	Info	zinc finger protein 609	NM_015042	Hs.595451	ZNF609	ENST00000326648	chr15:64966870-64966929			ABCC3
185	0.0002332	0.00201	10	15.72	0.64	23999	Info	hypothetical protein LOC375295	BC013438	Hs.659070	LOC375295		chr2:177494727-177494668			P4HA2
186	0.0002349	0.00201	20.7	11.62	1.78	25736	Info	glucocorticoid induced transcript 1	NM_138426	Hs.131673	GLCCI1	ENST00000456919	chr7:8126307-8126366
187	0.0002361	0.00201	39.73	19.6	2.03	15281	Info	six transmembrane epithelial antigen of the prostate 1	NM_012449	Hs.61635	STEAP1	ENST00000433102	chr7:89790531-89790590
188	0.0002496	0.0021	800.26	426.53	1.88	9070	Info	ankyrin repeat and kinase domain containing 1	NM_178510	Hs.448473	ANKK1	ENST00000303941	chr11:113271043-113271102
189	0.0002497	0.0021	24.48	48.44	0.51	17772	Info	fatty acid desaturase 1	NM_013402	Hs.503546	FADS1	ENST00000433932	chr11:61569631-61569572	Biosynthesis of unsaturated fatty acids
190	0.0002514	0.00211	46.62	15.15	3.08	4125	Info	SRY (sex determining region Y)-box 8	NM_014587	Hs.243678	SOX8	ENST00000293894	chr16:1035014-1035073
191	0.000257	0.00214	17.66	10	1.77	27282	Info	mitochondrial antiviral signaling protein	NM_020746	Hs.570362	MAVS	ENST00000416600	chr20:3848217-3848276	Cytosolic DNA-sensing pathway, Hepatitis C, RIG-I-like receptor signaling pathway
192	0.0002615	0.00215	33.97	13.13	2.59	3013	Info	Cbp/p300-interacting transactivator, with Glu/Asp-rich carboxy-terminal domain, 4	NM_133467	Hs.355820	CITED4	ENST00000372638	chr1:41326794-41326735
193	0.0002735	0.00215	145.72	42.52	3.43	6588	Info	chemokine (C-C motif) ligand 2	NM_002982	Hs.303649	CCL2	ENST00000225831	chr17:32584050-32584109	Low-density lipoprotein (LDL) pathway during atherogenesis, Msp/Ron Receptor Signaling Pathway, Pertussis toxin-insensitive CCR5 Signaling in Macrophage, Chagas disease (American trypanosomiasis), Chemokine signaling pathway, Cytokine-cytokine receptor in
194	0.0002735	0.00215	145.72	42.52	3.43	10956	Info	chemokine (C-C motif) ligand 2	NM_002982	Hs.303649	CCL2	ENST00000225831	chr17:32584050-32584109	Low-density lipoprotein (LDL) pathway during atherogenesis, Msp/Ron Receptor Signaling Pathway, Pertussis toxin-insensitive CCR5 Signaling in Macrophage, Chagas disease (American trypanosomiasis), Chemokine signaling pathway, Cytokine-cytokine receptor in
195	0.0002735	0.00215	145.72	42.52	3.43	20102	Info	chemokine (C-C motif) ligand 2	NM_002982	Hs.303649	CCL2	ENST00000225831	chr17:32584050-32584109	Low-density lipoprotein (LDL) pathway during atherogenesis, Msp/Ron Receptor Signaling Pathway, Pertussis toxin-insensitive CCR5 Signaling in Macrophage, Chagas disease (American trypanosomiasis), Chemokine signaling pathway, Cytokine-cytokine receptor in
196	0.0002735	0.00215	145.72	42.52	3.43	22802	Info	chemokine (C-C motif) ligand 2	NM_002982	Hs.303649	CCL2	ENST00000225831	chr17:32584050-32584109	Low-density lipoprotein (LDL) pathway during atherogenesis, Msp/Ron Receptor Signaling Pathway, Pertussis toxin-insensitive CCR5 Signaling in Macrophage, Chagas disease (American trypanosomiasis), Chemokine signaling pathway, Cytokine-cytokine receptor in
197	0.0002735	0.00215	145.72	42.52	3.43	26286	Info	chemokine (C-C motif) ligand 2	NM_002982	Hs.303649	CCL2	ENST00000225831	chr17:32584050-32584109	Low-density lipoprotein (LDL) pathway during atherogenesis, Msp/Ron Receptor Signaling Pathway, Pertussis toxin-insensitive CCR5 Signaling in Macrophage, Chagas disease (American trypanosomiasis), Chemokine signaling pathway, Cytokine-cytokine receptor in
198	0.0002735	0.00215	145.72	42.52	3.43	26703	Info	chemokine (C-C motif) ligand 2	NM_002982	Hs.303649	CCL2	ENST00000225831	chr17:32584050-32584109	Low-density lipoprotein (LDL) pathway during atherogenesis, Msp/Ron Receptor Signaling Pathway, Pertussis toxin-insensitive CCR5 Signaling in Macrophage, Chagas disease (American trypanosomiasis), Chemokine signaling pathway, Cytokine-cytokine receptor in
199	0.0002735	0.00215	145.72	42.52	3.43	35350	Info	chemokine (C-C motif) ligand 2	NM_002982	Hs.303649	CCL2	ENST00000225831	chr17:32584050-32584109	Low-density lipoprotein (LDL) pathway during atherogenesis, Msp/Ron Receptor Signaling Pathway, Pertussis toxin-insensitive CCR5 Signaling in Macrophage, Chagas disease (American trypanosomiasis), Chemokine signaling pathway, Cytokine-cytokine receptor in
200	0.0002735	0.00215	145.72	42.52	3.43	36527	Info	chemokine (C-C motif) ligand 2	NM_002982	Hs.303649	CCL2	ENST00000225831	chr17:32584050-32584109	Low-density lipoprotein (LDL) pathway during atherogenesis, Msp/Ron Receptor Signaling Pathway, Pertussis toxin-insensitive CCR5 Signaling in Macrophage, Chagas disease (American trypanosomiasis), Chemokine signaling pathway, Cytokine-cytokine receptor in
201	0.0002735	0.00215	145.72	42.52	3.43	37815	Info	chemokine (C-C motif) ligand 2	NM_002982	Hs.303649	CCL2	ENST00000225831	chr17:32584050-32584109	Low-density lipoprotein (LDL) pathway during atherogenesis, Msp/Ron Receptor Signaling Pathway, Pertussis toxin-insensitive CCR5 Signaling in Macrophage, Chagas disease (American trypanosomiasis), Chemokine signaling pathway, Cytokine-cytokine receptor in
202	0.0002735	0.00215	145.72	42.52	3.43	39713	Info	chemokine (C-C motif) ligand 2	NM_002982	Hs.303649	CCL2	ENST00000225831	chr17:32584050-32584109	Low-density lipoprotein (LDL) pathway during atherogenesis, Msp/Ron Receptor Signaling Pathway, Pertussis toxin-insensitive CCR5 Signaling in Macrophage, Chagas disease (American trypanosomiasis), Chemokine signaling pathway, Cytokine-cytokine receptor in
203	0.0002874	0.00225	14.93	26.81	0.56	10030	Info	acetyl-Coenzyme A acetyltransferase 2	NM_005891	Hs.571037	ACAT2	ENST00000367048	chr6:160199814-160199873	Butanoate metabolism, Fat digestion and absorption, Fatty acid degradation, Glyoxylate and dicarboxylate metabolism, Lysine degradation, Metabolic pathways, Propanoate metabolism, Pyruvate metabolism, Synthesis and degradation of ketone bodies, Terpenoid
204	0.0002941	0.00229	10.63	23.02	0.46	16830	Info	adrenergic, alpha-2C-, receptor	NM_000683	Hs.123022	ADRA2C	ENST00000330055	chr4:3770121-3770180	Neuroactive ligand-receptor interaction
205	0.0002949	0.00229	28.65	12.37	2.32	23217	Info	basonuclin 2	NM_017637	Hs.656581	BNC2		chr9:16413516-16413457
206	0.0003139	0.00242	40.64	18.37	2.21	27903	Info	inositol(myo)-1(or 4)-monophosphatase 2	NM_014214	Hs.367992	IMPA2	ENST00000269159	chr18:12030648-12030707	Inositol phosphate metabolism, Metabolic pathways, Phosphatidylinositol signaling system
207	0.0003196	0.00246	12.19	20.4	0.6	24692	Info	dysbindin (dystrobrevin binding protein 1) domain containing 2	NM_001048226	Hs.655055	DBNDD2	ENST00000445844	chr20:44038912-44038971
208	0.0003245	0.00248	21.2	10.8	1.96	15541	Info
209	0.0003288	0.0025	25.18	14.13	1.78	32219	Info	hypothetical protein FLJ23867	NR_026900	Hs.719176	FLJ23867	ENST00000367602	chr1:180169045-180169104
210	0.0003319	0.00251	111.08	26.55	4.18	15598	Info	leprecan-like 1	NM_018192	Hs.374191	LEPREL1	ENST00000427335	chr3:189674703-189674644
211	0.0003376	0.00254	592.25	334.13	1.77	12180	Info	PDZ domain containing 7	NM_024895	Hs.438245	PDZD7	ENST00000370215	chr10:102777238-102777179
212	0.0003387	0.00254	191.18	114.53	1.67	5694	Info	amyloid beta (A4) precursor-like protein 2	NM_001642	Hs.370247	APLP2	ENST00000263574	chr11:130014421-130014480
213	0.0003465	0.00259	123.34	22.25	5.54	38771	Info	clusterin	NM_203339	Hs.436657	CLU	ENST00000380446	chr8:27457462-27457403
214	0.0003533	0.00263	98.31	53.55	1.84	8269	Info	platelet-derived growth factor receptor, alpha polypeptide	NM_006206	Hs.74615	PDGFRA	ENST00000257290	chr4:55163989-55164048	CBL mediated ligand-induced downregulation of EGF receptors, Erk1/Erk2 Mapk Signaling pathway, PDGF Signaling Pathway, Phospholipids as signalling intermediaries, Rac 1 cell motility signaling pathway, Role of PI3K subunit p85 in regulation of Actin Organ
215	0.0003559	0.00263	12.5	20.19	0.62	34236	Info	interferon-induced protein with tetratricopeptide repeats 1	NM_001548	Hs.20315	IFIT1	ENST00000371804	chr10:91163438-91163497	Hepatitis C
216	0.0003568	0.00263	80.87	40.05	2.02	39284	Info	six transmembrane epithelial antigen of the prostate 1	NM_012449	Hs.61635	STEAP1	ENST00000433102	chr7:89794004-89794063
217	0.000365	0.00268	86.6	34.81	2.49	8170	Info
218	0.0003699	0.0027	77.1	46.91	1.64	10327	Info	bicaudal C homolog 1 (Drosophila)	AK130049	Hs.100261	BICC1	ENST00000373886	chr10:60590509-60590568
219	0.0003773	0.00274	69.77	32.58	2.14	9977	Info	latent transforming growth factor beta binding protein 1	NM_206943	Hs.713533	LTBP1	ENST00000404816	chr2:33623836-33623895	TGF-beta signaling pathway
220	0.0003787	0.00274	468.07	223.23	2.1	35434	Info	immunoglobulin-like domain containing receptor 1	NM_175924	Hs.98484	ILDR1	ENST00000344209	chr3:121707033-121706974
221	0.0003956	0.00285	17.91	10.34	1.73	23084	Info	solute carrier family 2 (facilitated glucose transporter), member 8	NM_014580	Hs.179522	SLC2A8	ENST00000430147	chr9:130169819-130169878
222	0.0004013	0.00288	21.64	34.24	0.63	12158	Info	hydroxysteroid (17-beta) dehydrogenase 11	NM_016245	Hs.594923	HSD17B11	ENST00000358290	chr4:88257881-88257822
223	0.0004219	0.00301	21.02	11.19	1.88	38609	Info	nuclear factor I/B	NM_005596	Hs.644095	NFIB	ENST00000380959	chr9:14081998-14081939
224	0.0004329	0.00307	28.96	14.97	1.93	14320	Info
225	0.0004416	0.00312	72.01	38.19	1.89	39531	Info	solute carrier family 39 (zinc transporter), member 7	NM_006979	Hs.631995	SLC39A7	ENST00000404800	chr6:33171800-33171859
226	0.000443	0.00312	163.53	356.64	0.46	28303	Info	inhibin, beta A	NM_002192	Hs.583348	INHBA	ENST00000442711	chr7:41729305-41729246	Cytokine-cytokine receptor interaction, TGF-beta signaling pathway
227	0.0004492	0.00315	107.92	68.54	1.57	25530	Info	fibronectin 1	NM_054034	Hs.203717	FN1	ENST00000426059	chr2:216288895-216288217	Amoebiasis, Bacterial invasion of epithelial cells, ECM-receptor interaction, Focal adhesion, Pathways in cancer, Regulation of actin cytoskeleton, Small cell lung cancer
228	0.0004551	0.00318	17.26	10.5	1.64	33153	Info	melanocortin 1 receptor (alpha melanocyte stimulating hormone receptor)	NM_002386	Hs.513829	MC1R		chr16:89987276-89987335	Melanogenesis, Neuroactive ligand-receptor interaction
229	0.0004571	0.00318	40.36	14	2.88	22165	Info	receptor accessory protein 2	NM_016606	Hs.416090	REEP2	ENST00000378339	chr5:137782577-137782636
230	0.0004595	0.00318	52.44	17.8	2.95	7034	Info	chromosome 9 open reading frame 167	NM_017723	Hs.495541	C9orf167	ENST00000357503	chr9:140176977-140177036
231	0.0004633	0.00319	11.8	25.76	0.46	32568	Info		AF088076	Hs.445045			chr1:159946495-159946554
232	0.0004676	0.00321	33.17	16.17	2.05	44834	Info	homeodomain interacting protein kinase 2	NM_022740	Hs.397465	HIPK2	ENST00000263551	chr7:139257423-139257364
233	0.0004911	0.00335	16.46	26.97	0.61	31640	Info	NK1 homeobox 2	NM_001146340	Hs.712041	NKX1-2		chr10:126136173-126136114
234	0.0004946	0.00336	51.98	26.68	1.95	2409	Info	six transmembrane epithelial antigen of the prostate 1	NM_012449	Hs.61635	STEAP1	ENST00000439708	chr7:89790569-89790628
235	0.0004996	0.00338	438.22	97.66	4.49	31596	Info	fibulin 1	NM_006486	Hs.24601	FBLN1	ENST00000348697	chr22:45996933-45996992
236	0.0005101	0.00343	370.44	140.02	2.65	35093	Info	collagen, type VIII, alpha 1	NM_001850	Hs.654548	COL8A1	ENST00000429802	chr3:99514765-99514824
237	0.000511	0.00343	11.24	20.01	0.56	35676	Info		AW268902	Hs.29802			chr4:20621781-20621722
238	0.0005144	0.00344	552.61	327.73	1.69	37530	Info	gamma-glutamyltransferase 6	NM_153338	Hs.130749	GGT6	ENST00000414312	chr17:4461097-4461038	Arachidonic acid metabolism, Cyanoamino acid metabolism, Glutathione metabolism, Metabolic pathways, Taurine and hypotaurine metabolism
239	0.0005202	0.00346	24.75	15.37	1.61	19181	Info	four jointed box 1 (Drosophila)	NM_014344	Hs.39384	FJX1	ENST00000317811	chr11:35642109-35642168
240	0.0005499	0.00363	985.54	636.68	1.55	1781	Info	solute carrier family 35, member E4	NM_001001479	Hs.660384	SLC35E4	ENST00000343605	chr22:31043087-31043146
241	0.0005501	0.00363	18.81	10	1.88	10959	Info		AF116688	Hs.658869			chr5:138631739-138631680
242	0.0005667	0.00373	24.34	45.05	0.54	37194	Info	zinc finger protein 469	NM_001127464	Hs.54925	ZNF469	ENST00000437464	chr16:88507087-88507146
243	0.000583	0.00382	19.79	10.76	1.84	33041	Info	sushi, nidogen and EGF-like domains 1	NM_001080437	Hs.471834	SNED1	ENST00000342631	chr2:242032106-242032165
244	0.0005897	0.00385	1205.75	707.13	1.71	28658	Info	kinesin light chain 3	BC025318	Hs.636501	KLC3		chr19:45850341-45850400
245	0.0006022	0.00391	37.47	24.12	1.55	6412	Info	RNA binding motif, single stranded interacting protein 1	NM_016836	Hs.470412	RBMS1	ENST00000392753	chr2:161143492-161141509
246	0.0006143	0.00397	175.8	71.45	2.46	34309	Info		AF090930				chr17:80480214-80480155
247	0.0006346	0.00409	10.06	15.09	0.67	24316	Info	cell growth regulator with EF-hand domain 1	NM_006569	Hs.159525	CGREF1	ENST00000405600	chr2:27324022-27323963
248	0.0006391	0.00409	36.12	72.2	0.5	35075	Info		BC043620	Hs.655222			chr17:40705452-40705393
249	0.0006401	0.00409	31.82	15.63	2.04	11632	Info	KCNQ1 overlapping transcript 1 (non-protein coding)	NR_002728		KCNQ1OT1		chr11:2705269-2705210
250	0.0006422	0.00409	23.61	10	2.36	27610	Info	solute carrier family 9 (sodium/hydrogen exchanger), member 3 regulator 1	AF015926	Hs.711846	SLC9A3R1		chr17:72765203-72765265	Cystic fibrosis transmembrane conductance regulator (CFTR) and beta 2 adrenergic receptor (b2AR) pathway
251	0.0006483	0.00411	15.18	25.24	0.6	35579	Info	phosducin-like 3	NM_024065	Hs.469459	PDCL3	ENST00000450127	chr2:101188181-101188240
252	0.0006574	0.00415	17.09	10.31	1.66	10850	Info
253	0.0006619	0.00416	16.63	26.15	0.64	4906	Info	neuroplastin	NM_012428	Hs.187866	NPTN	ENST00000345330	chr15:73853376-73853317
254	0.0006644	0.00416	24.24	14.29	1.7	32462	Info	zinc finger protein 395	NM_018660	Hs.435535	ZNF395	ENST00000344423	chr8:28203450-28203391
255	0.0006699	0.00418	16.67	10.55	1.58	9244	Info	tyrosine kinase, non-receptor, 2	NM_001010938	Hs.518513	TNK2	ENST00000414741	chr3:195594338-195594279
256	0.0006771	0.00421	365.83	653.64	0.56	15455	Info	chromosome 1 open reading frame 198	NM_032800	Hs.520494	C1orf198	ENST00000456313	chr1:230973004-230972945
257	0.0006794	0.00421	202.95	348.99	0.58	21351	Info	MAP kinase interacting serine/threonine kinase 2	NM_017572	Hs.515032	MKNK2	ENST00000250896	chr19:2037572-2037513	Erk1/Erk2 Mapk Signaling pathway, MAPKinase Signaling Pathway, Insulin signaling pathway, MAPK signaling pathway
258	0.0006926	0.00427	89.16	147.7	0.6	43877	Info
259	0.0006974	0.00428	30.81	15.01	2.05	24875	Info
260	0.0007155	0.00436	15.61	10.39	1.5	35209	Info
261	0.0007163	0.00436	25.39	41.58	0.61	26888	Info	emopamil binding protein (sterol isomerase)	NM_006579	Hs.30619	EBP	ENST00000495186	chrX:48386942-48387001	Metabolic pathways, Steroid biosynthesis
262	0.0007209	0.00436	18.31	10.59	1.73	36258	Info	TBC1 domain family, member 3F	NM_032258	Hs.454716	TBC1D3F	ENST00000451448	chr17:36294855-36294914
263	0.0007212	0.00436	46.31	73.17	0.63	28483	Info	cytochrome P450, family 3, subfamily A, polypeptide 5	AK299002	Hs.695915	CYP3A5	ENST00000439761	chr7:99270154-99270095	Drug metabolism - cytochrome P450, Drug metabolism - other enzymes, Linoleic acid metabolism, Metabolic pathways, Metabolism of xenobiotics by cytochrome P450, Retinol metabolism, Steroid hormone biosynthesis
264	0.0007321	0.00441	176.68	29.37	6.02	655	Info	insulin-like growth factor binding protein 2, 36kDa	NM_000597	Hs.438102	IGFBP2	ENST00000233809	chr2:217527145-217527204	Ghrelin: Regulation of Food Intake and Energy Homeostasis
265	0.0007356	0.00442	176.47	63.72	2.77	37508	Info		M15530	Hs.654375			chr16:58588342-58588401
266	0.0007621	0.00456	495.68	252.12	1.97	9404	Info	alpha-kinase 1	AK026323	Hs.652825	ALPK1	ENST00000309610	chr4:113335929-113335988
267	0.0007673	0.00457	20.49	10.24	2	41979	Info	cytochrome P450, family 1, subfamily A, polypeptide 2	NM_000761	Hs.1361	CYP1A2	ENST00000343932	chr15:75047509-75047568	Mechanism of Acetaminophen Activity and Toxicity, Nuclear Receptors in Lipid Metabolism and Toxicity, Caffeine metabolism, Drug metabolism - cytochrome P450, Linoleic acid metabolism, Metabolic pathways, Metabolism of xenobiotics by cytochrome P450, Retin
268	0.0007759	0.00461	103.9	46.86	2.22	36688	Info	glypican 6	NM_005708	Hs.444329	GPC6		chr13:95059334-95059393
269	0.0007975	0.00472	32.18	14.5	2.22	13276	Info		AK054921				chr16:18800712-18800653
270	0.0008103	0.00477	45.56	17.44	2.61	44092	Info	mitochondrial ribosomal protein S6	NM_032476	Hs.302742	MRPS6	ENST00000399312	chr21:35514794-35514853
271	0.0008137	0.00478	394.89	215.08	1.84	26709	Info
272	0.0008246	0.00481	67.91	28.4	2.39	5460	Info	inactivation escape 1 (non-protein coding)	NR_024616	Hs.657350	INE1	ENST00000456273	chrX:47065063-47065122
273	0.0008265	0.00481	685.5	442.2	1.55	31061	Info	quiescin Q6 sulfhydryl oxidase 1	NM_002826	Hs.518374	QSOX1	ENST00000443059	chr1:180167049-180167108
274	0.000828	0.00481	11.44	39.85	0.29	25023	Info
275	0.0008406	0.00486	15.12	25.99	0.58	19860	Info	protein phosphatase 1, regulatory (inhibitor) subunit 3B	NM_024607	Hs.458513	PPP1R3B	ENST00000310455	chr8:8993872-8993813	Insulin signaling pathway
276	0.0008427	0.00486	374.27	195.32	1.92	41954	Info	paxillin	BC052611	Hs.446336	PXN		chr12:120656057-120655998	Bacterial invasion of epithelial cells, Chemokine signaling pathway, Focal adhesion, Leukocyte transendothelial migration, Regulation of actin cytoskeleton, VEGF signaling pathway
277	0.0008483	0.00487	17.43	84.48	0.21	29043	Info
278	0.0008659	0.00496	18.65	29.24	0.64	34616	Info	aldehyde dehydrogenase 4 family, member A1	NM_003748	Hs.77448	ALDH4A1	ENST00000375341	chr1:19198108-19198049	Alanine, aspartate and glutamate metabolism, Arginine and proline metabolism, Metabolic pathways
279	0.0008925	0.00509	34.39	13.63	2.52	21500	Info	neurogenin 1	NM_006161	Hs.248149	NEUROG1	ENST00000314744	chr5:134870771-134870712
280	0.0009153	0.00519	23.84	13.81	1.73	44463	Info	cryptochrome 2 (photolyase-like)	NM_021117	Hs.532491	CRY2	ENST00000263762	chr11:45904680-45904739	Circadian Rhythms, Circadian rhythm
281	0.0009195	0.00519	14.9	66.94	0.22	12737	Info	keratin 18	NM_000224	Hs.406013	KRT18	ENST00000388835	chr12:53345577-53345636	Pathogenic Escherichia coli infection
282	0.0009198	0.00519	12.44	49.8	0.25	16648	Info
283	0.0009287	0.00522	84.71	48.43	1.75	16897	Info	adenylate kinase 1	NM_000476	Hs.175473	AK1	ENST00000223836	chr9:130630712-130630653	Metabolic pathways, Purine metabolism
284	0.000941	0.00527	15.2	54.91	0.28	20712	Info
285	0.0009496	0.0053	20.56	102.66	0.2	40707	Info	keratin 18	NM_000224	Hs.406013	KRT18	ENST00000388835	chr12:53344612-53344671	Pathogenic Escherichia coli infection
286	0.0009553	0.00531	21.85	36.27	0.6	41831	Info	sarcospan (Kras oncogene-associated gene)	NM_005086	Hs.183428	SSPN	ENST00000242729	chr12:26385695-26385754
287	0.0009735	0.00538	120.5	60.99	1.98	33636	Info	transducin-like enhancer of split 1 (E(sp1) homolog, Drosophila)	BC000228	Hs.197320	TLE1	ENST00000361739	chr9:84198635-84198576	WNT Signaling Pathway
288	0.0009744	0.00538	20.62	100.45	0.21	4101	Info
289	0.0009847	0.00541	32.59	15.43	2.11	7682	Info	ATP-binding cassette, sub-family C (CFTR/MRP), member 3	NM_003786	Hs.463421	ABCC3	ENST00000285238	chr17:48768701-48768760	Multi-Drug Resistance Factors, Nuclear Receptors in Lipid Metabolism and Toxicity, ABC transporters, Bile secretion
290	0.0009854	0.00541	151.15	236.99	0.64	17223	Info	prolyl 4-hydroxylase, alpha polypeptide II	NM_004199	Hs.519568	P4HA2	ENST00000379104	chr5:131528367-131528308	Arginine and proline metabolism, Metabolic pathways
