# Supplementary material for: Identification of biological pathways and genes associated with neurogenic heterotopic ossification by text mining
Source: PeerJ. 2020 Jan 3;8:e8276. doi: 10.7717/peerj.8276 (PMC6944123; doi:10.7717/peerj.8276)
Supplement: Supplemental Information 6 — Table S17: The expression of GDF15 in Nervous system. Table S18: The expression of LDLR in Nervous system. Table S19: The expression of CCL2 in Nervous system. Table S20: The expression of CLU in Nervous system. [file peerj-08-8276-s006.xls]

## Sheet:     Table of Contents
Table of Contents
Title of the Tables	Gene names
Table S17 The expression of GDF15 in Nervous system	GDF15
Table S18 The expression of LDLR in Nervous system	LDLR
Table S19 The expression of CCL2 in Nervous system	CCL2
Table S20 The expression of CLU in Nervous system	CLU

## Sheet: GDF15
Table S17 The expression of GDF15 in Nervous system
Group #	Tissue	Expression Level	Standard Deviation	Samples	Links
1	Whole Brain-[3]	1.96	0	GSM44690,	To the Experiment
1	Corpus Callosum-[3]	1.63	0	GSM44696,	To the Experiment
1	Amygdala-[3]	1.47	0	GSM44694,	To the Experiment
1	Fetal Brain-[3]	1.59	0	GSM44691,	To the Experiment
1	Thalamus-[3]	2.37	0	GSM44698,	To the Experiment
1	Caudate Nucleus-[3]	2.99	0	GSM44695,	To the Experiment
1	Hippocampus-[3]	1.26	0	GSM44697,	To the Experiment
1	Cerebellum-[3]	2.24	0	GSM44689,	To the Experiment
1	Spinal Cord-[3]	1.52	0	GSM44700,	To the Experiment
2	Ciliary Ganglion-[1]	6.44	0.6	GSM19003,GSM19004,	To the Experiment
2	Amygdala-[1]	2.75	0.48	GSM18927,GSM18928,	To the Experiment
2	Subthalamic Nucleus-[1]	8.78	0.18	GSM18937,GSM18938,	To the Experiment
2	Fetal Brain-[1]	4.66	0.24	GSM18945,GSM18946,	To the Experiment
2	Thalamus-[1]	4.45	1.96	GSM18935,GSM18936,	To the Experiment
2	Trigeminal Ganglion-[1]	11.54	4.56	GSM19005,GSM19006,	To the Experiment
2	Whole Brain-[1]	3.1	0.52	GSM18921,GSM18922,	To the Experiment
2	Olfactory Bulb-[1]	3.8	0.39	GSM19019,GSM19020,	To the Experiment
2	Caudate Nucleus-[1]	3.16	0.95	GSM18919,GSM18920,	To the Experiment
2	Cingulate Cortex-[1]	3.3	1.19	GSM18939,GSM18940,	To the Experiment
2	Globus Pallidus-[1]	5.14	1.15	GSM18913,GSM18914,	To the Experiment
2	Hypothalamus-[1]	2.6	0.11	GSM18933,GSM18934,	To the Experiment
2	Prefrontal Cortex-[1]	2.53	0.54	GSM18929,GSM18930,	To the Experiment
2	Parietal Lobe-[1]	4.54	0.2	GSM18923,GSM18924,	To the Experiment
2	Occipital Lobe-[1]	3.52	0.23	GSM18931,GSM18932,	To the Experiment
2	Temporal Lobe-[1]	3.7	0.69	GSM18911,GSM18912,	To the Experiment
2	Cerebellum-[1]	5.31	0.55	GSM18917,GSM18918,	To the Experiment
2	Cardiac Myocyte-[1]	3.87	0.6	GSM18969,GSM18970,	To the Experiment
2	Atrioventricular Node-[1]	7.16	0.84	GSM19007,GSM19008,	To the Experiment
2	Dorsal Root Ganglion-[1]	3.24	1.02	GSM19009,GSM19010,	To the Experiment
2	Cerebellum Peduncle-[1]	4.91	1	GSM18915,GSM18916,	To the Experiment
2	Pons-[1]	10.16	0.36	GSM18941,GSM18942,	To the Experiment
2	Medulla Oblongata-[1]	6.49	0.03	GSM18925,GSM18926,	To the Experiment
2	Spinal Cord-[1]	5.04	1.72	GSM18943,GSM18944,	To the Experiment
2	SCG-[1]	9.32	3.88	GSM19011,GSM19012,	To the Experiment
3	Corpus Callosum-[2]	2.86	1.93	GSM80622,GSM80647,GSM80646,GSM80620,GSM80645,GSM80644,GSM80628,GSM80623,GSM80621,	To the Experiment
3	Amygdala-[2]	3.71	2.16	GSM80566,GSM80593,GSM80592,GSM80591,GSM80585,GSM80568,GSM80567,GSM80565,	To the Experiment
3	Subthalamic Nucleus-[2]	2.49	0.56	GSM80857,GSM80856,GSM80827,GSM80854,GSM80850,GSM80846,GSM80829,GSM80828,	To the Experiment
3	Hippocampus-[2]	2.69	1.9	GSM80664,GSM80682,GSM80681,GSM80680,GSM80665,GSM80663,GSM80679,GSM80668,GSM80662,	To the Experiment
3	Thalamus-[2]	4.53	5.43	GSM80839,GSM80862,GSM80863,GSM80852,GSM80849,GSM80841,GSM80840,GSM80838,	To the Experiment
3	Nucleus Accumbens-[2]	5.94	7.41	GSM80573,GSM80600,GSM80599,GSM80598,GSM80597,GSM80587,GSM80575,GSM80574,GSM80572,	To the Experiment
3	Trigeminal Ganglion-[2]	2.1	0.97	GSM80906,GSM80905,GSM80876,GSM80895,GSM80891,GSM80878,GSM80877,GSM80875,	To the Experiment
3	Hypothalamus-[2]	2.42	2.13	GSM80691,GSM80690,GSM80684,GSM80670,GSM80683,GSM80669,GSM80692,GSM80693,	To the Experiment
3	Putamen-[2]	4.81	5.12	GSM80595,GSM80571,GSM80601,GSM80596,GSM80594,GSM80586,GSM80581,GSM80570,GSM80569,	To the Experiment
3	Substantia Nigra-[2]	2.68	1.84	GSM80859,GSM80858,GSM80831,GSM80855,GSM80847,GSM80833,GSM80832,GSM80830,	To the Experiment
3	Cerebral Cortex-[2]	2.63	1.32	GSM80650,GSM80643,GSM80642,GSM80640,GSM80641,GSM80653,GSM80652,GSM80627,GSM80651,	To the Experiment
3	Frontal Lobe-[2]	4.54	5.02	GSM80660,GSM80666,GSM80678,GSM80677,GSM80676,GSM80675,GSM80667,GSM80671,GSM80661,	To the Experiment
3	Parietal Lobe-[2]	3.86	5.12	GSM80746,GSM80763,GSM80762,GSM80744,GSM80761,GSM80760,GSM80752,GSM80747,GSM80745,	To the Experiment
3	Occipital Lobe-[2]	1.77	0.8	GSM80773,GSM80772,GSM80767,GSM80756,GSM80775,GSM80754,GSM80766,GSM80774,	To the Experiment
3	Temporal Lobe-[2]	2.08	0.65	GSM80835,GSM80860,GSM80861,GSM80851,GSM80848,GSM80837,GSM80836,GSM80834,	To the Experiment
3	Cerebellum-[2]	5.98	6.3	GSM80618,GSM80639,GSM80638,GSM80637,GSM80636,GSM80626,GSM80619,GSM80617,GSM80616,	To the Experiment
3	Dorsal Root Ganglion-[2]	2.3	1.36	GSM80649,GSM80611,GSM80613,GSM80648,GSM80630,GSM80629,GSM80614,GSM80612,	To the Experiment
3	Midbrain-[2]	2.41	1.1	GSM80699,GSM80715,GSM80701,GSM80706,GSM80705,GSM80704,GSM80703,GSM80702,GSM80700,	To the Experiment
3	VTA-[2]	3.74	3.12	GSM80871,GSM80907,GSM80908,GSM80894,GSM80892,GSM80873,GSM80872,GSM80870,	To the Experiment
3	SVN-[2]	3.63	4.67	GSM80910,GSM80909,GSM80879,GSM80896,GSM80893,GSM80881,GSM80880,	To the Experiment
3	Medulla Oblongata-[2]	2.26	0.78	GSM80708,GSM80711,GSM80724,GSM80723,GSM80722,GSM80721,GSM80713,GSM80714,GSM80709,	To the Experiment
3	Spinal Cord-[2]	2.41	1.54	GSM80799,GSM80798,GSM80785,GSM80795,GSM80794,GSM80787,GSM80786,GSM80784,	To the Experiment
3	Nodose Nucleus-[2]	3.12	2.37	GSM80769,GSM80768,GSM80765,GSM80755,GSM80771,GSM80764,GSM80770,GSM80753,	To the Experiment

## Sheet: LDLR
Table S18 The expression of LDLR in Nervous system
Group #	Tissue	Expression Level	Standard Deviation	Samples	Links
1	Whole Brain-[3]	3.9	0	GSM44690,	To the Experiment
1	Corpus Callosum-[3]	3.36	0	GSM44696,	To the Experiment
1	Amygdala-[3]	2.9	0	GSM44694,	To the Experiment
1	Fetal Brain-[3]	5.1	0	GSM44691,	To the Experiment
1	Thalamus-[3]	5.01	0	GSM44698,	To the Experiment
1	Caudate Nucleus-[3]	4.25	0	GSM44695,	To the Experiment
1	Hippocampus-[3]	3.67	0	GSM44697,	To the Experiment
1	Cerebellum-[3]	4.27	0	GSM44689,	To the Experiment
1	Spinal Cord-[3]	3.17	0	GSM44700,	To the Experiment
2	Ciliary Ganglion-[1]	15.51	4.2	GSM19003,GSM19004,	To the Experiment
2	Amygdala-[1]	7.33	0.23	GSM18927,GSM18928,	To the Experiment
2	Subthalamic Nucleus-[1]	10.92	2.74	GSM18937,GSM18938,	To the Experiment
2	Fetal Brain-[1]	5.85	0.5	GSM18945,GSM18946,	To the Experiment
2	Thalamus-[1]	7.41	1.22	GSM18935,GSM18936,	To the Experiment
2	Trigeminal Ganglion-[1]	18.3	7.71	GSM19005,GSM19006,	To the Experiment
2	Whole Brain-[1]	6.24	0.75	GSM18921,GSM18922,	To the Experiment
2	Olfactory Bulb-[1]	7.82	2.04	GSM19019,GSM19020,	To the Experiment
2	Caudate Nucleus-[1]	6.28	2.45	GSM18919,GSM18920,	To the Experiment
2	Cingulate Cortex-[1]	8.67	0.83	GSM18939,GSM18940,	To the Experiment
2	Globus Pallidus-[1]	13.84	1.49	GSM18913,GSM18914,	To the Experiment
2	Hypothalamus-[1]	27.12	20.59	GSM18933,GSM18934,	To the Experiment
2	Prefrontal Cortex-[1]	5.91	0.02	GSM18929,GSM18930,	To the Experiment
2	Parietal Lobe-[1]	13.94	2.21	GSM18923,GSM18924,	To the Experiment
2	Occipital Lobe-[1]	8.52	1.36	GSM18931,GSM18932,	To the Experiment
2	Temporal Lobe-[1]	11.27	0.64	GSM18911,GSM18912,	To the Experiment
2	Cerebellum-[1]	14.53	0.9	GSM18917,GSM18918,	To the Experiment
2	Cardiac Myocyte-[1]	17.03	2.63	GSM18969,GSM18970,	To the Experiment
2	Atrioventricular Node-[1]	10.7	2.75	GSM19007,GSM19008,	To the Experiment
2	Dorsal Root Ganglion-[1]	11.56	1.35	GSM19009,GSM19010,	To the Experiment
2	Cerebellum Peduncle-[1]	14.48	7.63	GSM18915,GSM18916,	To the Experiment
2	Pons-[1]	7.67	0.94	GSM18941,GSM18942,	To the Experiment
2	Medulla Oblongata-[1]	9.98	0.1	GSM18925,GSM18926,	To the Experiment
2	Spinal Cord-[1]	12.02	2.16	GSM18943,GSM18944,	To the Experiment
2	SCG-[1]	18.28	6.54	GSM19011,GSM19012,	To the Experiment
3	Corpus Callosum-[2]	44.45	44.12	GSM80622,GSM80647,GSM80646,GSM80620,GSM80645,GSM80644,GSM80628,GSM80623,GSM80621,	To the Experiment
3	Amygdala-[2]	23.15	16.35	GSM80566,GSM80593,GSM80592,GSM80591,GSM80585,GSM80568,GSM80567,GSM80565,	To the Experiment
3	Subthalamic Nucleus-[2]	38.42	15.55	GSM80857,GSM80856,GSM80827,GSM80854,GSM80850,GSM80846,GSM80829,GSM80828,	To the Experiment
3	Hippocampus-[2]	57.07	32.3	GSM80664,GSM80682,GSM80681,GSM80680,GSM80665,GSM80663,GSM80679,GSM80668,GSM80662,	To the Experiment
3	Thalamus-[2]	26.53	26.91	GSM80839,GSM80862,GSM80863,GSM80852,GSM80849,GSM80841,GSM80840,GSM80838,	To the Experiment
3	Nucleus Accumbens-[2]	15.61	17.19	GSM80573,GSM80600,GSM80599,GSM80598,GSM80597,GSM80587,GSM80575,GSM80574,GSM80572,	To the Experiment
3	Trigeminal Ganglion-[2]	90.54	38.37	GSM80906,GSM80905,GSM80876,GSM80895,GSM80891,GSM80878,GSM80877,GSM80875,	To the Experiment
3	Hypothalamus-[2]	43.48	23.15	GSM80691,GSM80690,GSM80684,GSM80670,GSM80683,GSM80669,GSM80692,GSM80693,	To the Experiment
3	Putamen-[2]	34.45	31.45	GSM80595,GSM80571,GSM80601,GSM80596,GSM80594,GSM80586,GSM80581,GSM80570,GSM80569,	To the Experiment
3	Substantia Nigra-[2]	34.98	30.55	GSM80859,GSM80858,GSM80831,GSM80855,GSM80847,GSM80833,GSM80832,GSM80830,	To the Experiment
3	Cerebral Cortex-[2]	29.66	24.18	GSM80650,GSM80643,GSM80642,GSM80640,GSM80641,GSM80653,GSM80652,GSM80627,GSM80651,	To the Experiment
3	Frontal Lobe-[2]	39.42	53.17	GSM80660,GSM80666,GSM80678,GSM80677,GSM80676,GSM80675,GSM80667,GSM80671,GSM80661,	To the Experiment
3	Parietal Lobe-[2]	54.77	67.93	GSM80746,GSM80763,GSM80762,GSM80744,GSM80761,GSM80760,GSM80752,GSM80747,GSM80745,	To the Experiment
3	Occipital Lobe-[2]	28.87	25.73	GSM80773,GSM80772,GSM80767,GSM80756,GSM80775,GSM80754,GSM80766,GSM80774,	To the Experiment
3	Temporal Lobe-[2]	17.74	15.02	GSM80835,GSM80860,GSM80861,GSM80851,GSM80848,GSM80837,GSM80836,GSM80834,	To the Experiment
3	Cerebellum-[2]	34.46	29.11	GSM80618,GSM80639,GSM80638,GSM80637,GSM80636,GSM80626,GSM80619,GSM80617,GSM80616,	To the Experiment
3	Dorsal Root Ganglion-[2]	91.11	44.45	GSM80649,GSM80611,GSM80613,GSM80648,GSM80630,GSM80629,GSM80614,GSM80612,	To the Experiment
3	Midbrain-[2]	78.03	32.05	GSM80699,GSM80715,GSM80701,GSM80706,GSM80705,GSM80704,GSM80703,GSM80702,GSM80700,	To the Experiment
3	VTA-[2]	55	43.39	GSM80871,GSM80907,GSM80908,GSM80894,GSM80892,GSM80873,GSM80872,GSM80870,	To the Experiment
3	SVN-[2]	60.22	24.27	GSM80910,GSM80909,GSM80879,GSM80896,GSM80893,GSM80881,GSM80880,	To the Experiment
3	Medulla Oblongata-[2]	91.13	41.36	GSM80708,GSM80711,GSM80724,GSM80723,GSM80722,GSM80721,GSM80713,GSM80714,GSM80709,	To the Experiment
3	Spinal Cord-[2]	69.75	53.1	GSM80799,GSM80798,GSM80785,GSM80795,GSM80794,GSM80787,GSM80786,GSM80784,	To the Experiment
3	Nodose Nucleus-[2]	54.32	36.56	GSM80769,GSM80768,GSM80765,GSM80755,GSM80771,GSM80764,GSM80770,GSM80753,	To the Experiment

## Sheet: CCL2
Table S19 The expression of CCL2 in Nervous system
Group #	Tissue	Expression Level	Standard Deviation	Samples	Links
1	Whole Brain-[3]	6.37	0	GSM44690,	To the Experiment
1	Corpus Callosum-[3]	46.5	0	GSM44696,	To the Experiment
1	Amygdala-[3]	23.26	0	GSM44694,	To the Experiment
1	Fetal Brain-[3]	4.99	0	GSM44691,	To the Experiment
1	Thalamus-[3]	10.55	0	GSM44698,	To the Experiment
1	Caudate Nucleus-[3]	9.29	0	GSM44695,	To the Experiment
1	Hippocampus-[3]	7.38	0	GSM44697,	To the Experiment
1	Cerebellum-[3]	5.79	0	GSM44689,	To the Experiment
1	Spinal Cord-[3]	255.59	0	GSM44700,	To the Experiment
2	Ciliary Ganglion-[1]	100.29	74.97	GSM19003,GSM19004,	To the Experiment
2	Amygdala-[1]	33.09	20.91	GSM18927,GSM18928,	To the Experiment
2	Subthalamic Nucleus-[1]	22.25	4.28	GSM18937,GSM18938,	To the Experiment
2	Fetal Brain-[1]	141.92	12.96	GSM18945,GSM18946,	To the Experiment
2	Thalamus-[1]	11.08	1.86	GSM18935,GSM18936,	To the Experiment
2	Trigeminal Ganglion-[1]	188.37	17.88	GSM19005,GSM19006,	To the Experiment
2	Whole Brain-[1]	15.45	9.59	GSM18921,GSM18922,	To the Experiment
2	Olfactory Bulb-[1]	38.26	14.04	GSM19019,GSM19020,	To the Experiment
2	Caudate Nucleus-[1]	16.24	5.49	GSM18919,GSM18920,	To the Experiment
2	Cingulate Cortex-[1]	65.25	53.88	GSM18939,GSM18940,	To the Experiment
2	Globus Pallidus-[1]	26.38	5.88	GSM18913,GSM18914,	To the Experiment
2	Hypothalamus-[1]	29.6	1.48	GSM18933,GSM18934,	To the Experiment
2	Prefrontal Cortex-[1]	19.81	10.21	GSM18929,GSM18930,	To the Experiment
2	Parietal Lobe-[1]	17.07	0.22	GSM18923,GSM18924,	To the Experiment
2	Occipital Lobe-[1]	30.63	14.98	GSM18931,GSM18932,	To the Experiment
2	Temporal Lobe-[1]	50.65	19.97	GSM18911,GSM18912,	To the Experiment
2	Cerebellum-[1]	14	5.6	GSM18917,GSM18918,	To the Experiment
2	Cardiac Myocyte-[1]	2012.26	824.38	GSM18969,GSM18970,	To the Experiment
2	Atrioventricular Node-[1]	17.84	6.93	GSM19007,GSM19008,	To the Experiment
2	Dorsal Root Ganglion-[1]	11.27	1.14	GSM19009,GSM19010,	To the Experiment
2	Cerebellum Peduncle-[1]	8.95	3.71	GSM18915,GSM18916,	To the Experiment
2	Pons-[1]	349.62	19.44	GSM18941,GSM18942,	To the Experiment
2	Medulla Oblongata-[1]	14.34	5.13	GSM18925,GSM18926,	To the Experiment
2	Spinal Cord-[1]	148.41	83.35	GSM18943,GSM18944,	To the Experiment
2	SCG-[1]	26.65	4.04	GSM19011,GSM19012,	To the Experiment
3	Corpus Callosum-[2]	112.14	84.24	GSM80622,GSM80647,GSM80646,GSM80620,GSM80645,GSM80644,GSM80628,GSM80623,GSM80621,	To the Experiment
3	Amygdala-[2]	46.91	70.93	GSM80566,GSM80593,GSM80592,GSM80591,GSM80585,GSM80568,GSM80567,GSM80565,	To the Experiment
3	Subthalamic Nucleus-[2]	92.42	90.92	GSM80857,GSM80856,GSM80827,GSM80854,GSM80850,GSM80846,GSM80829,GSM80828,	To the Experiment
3	Hippocampus-[2]	212.06	521.51	GSM80664,GSM80682,GSM80681,GSM80680,GSM80665,GSM80663,GSM80679,GSM80668,GSM80662,	To the Experiment
3	Thalamus-[2]	32.46	45.52	GSM80839,GSM80862,GSM80863,GSM80852,GSM80849,GSM80841,GSM80840,GSM80838,	To the Experiment
3	Nucleus Accumbens-[2]	21.38	17.7	GSM80573,GSM80600,GSM80599,GSM80598,GSM80597,GSM80587,GSM80575,GSM80574,GSM80572,	To the Experiment
3	Trigeminal Ganglion-[2]	911.24	1049.53	GSM80906,GSM80905,GSM80876,GSM80895,GSM80891,GSM80878,GSM80877,GSM80875,	To the Experiment
3	Hypothalamus-[2]	18.86	23.9	GSM80691,GSM80690,GSM80684,GSM80670,GSM80683,GSM80669,GSM80692,GSM80693,	To the Experiment
3	Putamen-[2]	15.82	22.08	GSM80595,GSM80571,GSM80601,GSM80596,GSM80594,GSM80586,GSM80581,GSM80570,GSM80569,	To the Experiment
3	Substantia Nigra-[2]	32.21	29.26	GSM80859,GSM80858,GSM80831,GSM80855,GSM80847,GSM80833,GSM80832,GSM80830,	To the Experiment
3	Cerebral Cortex-[2]	8.85	4.73	GSM80650,GSM80643,GSM80642,GSM80640,GSM80641,GSM80653,GSM80652,GSM80627,GSM80651,	To the Experiment
3	Frontal Lobe-[2]	52.47	64.18	GSM80660,GSM80666,GSM80678,GSM80677,GSM80676,GSM80675,GSM80667,GSM80671,GSM80661,	To the Experiment
3	Parietal Lobe-[2]	33.39	29.39	GSM80746,GSM80763,GSM80762,GSM80744,GSM80761,GSM80760,GSM80752,GSM80747,GSM80745,	To the Experiment
3	Occipital Lobe-[2]	16.78	14.04	GSM80773,GSM80772,GSM80767,GSM80756,GSM80775,GSM80754,GSM80766,GSM80774,	To the Experiment
3	Temporal Lobe-[2]	26.98	22.4	GSM80835,GSM80860,GSM80861,GSM80851,GSM80848,GSM80837,GSM80836,GSM80834,	To the Experiment
3	Cerebellum-[2]	56.81	92.91	GSM80618,GSM80639,GSM80638,GSM80637,GSM80636,GSM80626,GSM80619,GSM80617,GSM80616,	To the Experiment
3	Dorsal Root Ganglion-[2]	368.71	337.31	GSM80649,GSM80611,GSM80613,GSM80648,GSM80630,GSM80629,GSM80614,GSM80612,	To the Experiment
3	Midbrain-[2]	134.58	235.21	GSM80699,GSM80715,GSM80701,GSM80706,GSM80705,GSM80704,GSM80703,GSM80702,GSM80700,	To the Experiment
3	VTA-[2]	313.01	723.19	GSM80871,GSM80907,GSM80908,GSM80894,GSM80892,GSM80873,GSM80872,GSM80870,	To the Experiment
3	SVN-[2]	12.82	8.42	GSM80910,GSM80909,GSM80879,GSM80896,GSM80893,GSM80881,GSM80880,	To the Experiment
3	Medulla Oblongata-[2]	266.56	224.4	GSM80708,GSM80711,GSM80724,GSM80723,GSM80722,GSM80721,GSM80713,GSM80714,GSM80709,	To the Experiment
3	Spinal Cord-[2]	558.9	511.01	GSM80799,GSM80798,GSM80785,GSM80795,GSM80794,GSM80787,GSM80786,GSM80784,	To the Experiment
3	Nodose Nucleus-[2]	31.79	27.84	GSM80769,GSM80768,GSM80765,GSM80755,GSM80771,GSM80764,GSM80770,GSM80753,	To the Experiment

## Sheet: CLU
Table S20 The expression of CLU in Nervous system
Group #	Tissue	Expression Level	Standard Deviation	Samples	Links
3	Spinal Cord-[2]	9109.11	2262.07	GSM80799,GSM80798,GSM80785,GSM80795,GSM80794,GSM80787,GSM80786,GSM80784,	To the Experiment
3	Amygdala-[2]	6892.83	1286.3	GSM80566,GSM80593,GSM80592,GSM80591,GSM80585,GSM80568,GSM80567,GSM80565,	To the Experiment
3	Hypothalamus-[2]	5539.45	1318.47	GSM80691,GSM80690,GSM80684,GSM80670,GSM80683,GSM80669,GSM80692,GSM80693,	To the Experiment
3	Subthalamic Nucleus-[2]	5517.67	2131.7	GSM80857,GSM80856,GSM80827,GSM80854,GSM80850,GSM80846,GSM80829,GSM80828,	To the Experiment
3	Substantia Nigra-[2]	5348.43	1442.21	GSM80859,GSM80858,GSM80831,GSM80855,GSM80847,GSM80833,GSM80832,GSM80830,	To the Experiment
3	Corpus Callosum-[2]	5340.79	2786.86	GSM80622,GSM80647,GSM80646,GSM80620,GSM80645,GSM80644,GSM80628,GSM80623,GSM80621,	To the Experiment
3	Nucleus Accumbens-[2]	5319.49	956.91	GSM80573,GSM80600,GSM80599,GSM80598,GSM80597,GSM80587,GSM80575,GSM80574,GSM80572,	To the Experiment
3	Dorsal Root Ganglion-[2]	5289.7	1118.35	GSM80649,GSM80611,GSM80613,GSM80648,GSM80630,GSM80629,GSM80614,GSM80612,	To the Experiment
3	Medulla Oblongata-[2]	5288.98	2946.86	GSM80708,GSM80711,GSM80724,GSM80723,GSM80722,GSM80721,GSM80713,GSM80714,GSM80709,	To the Experiment
3	Trigeminal Ganglion-[2]	5275.46	1077.07	GSM80906,GSM80905,GSM80876,GSM80895,GSM80891,GSM80878,GSM80877,GSM80875,	To the Experiment
3	VTA-[2]	5250.75	1005.03	GSM80871,GSM80907,GSM80908,GSM80894,GSM80892,GSM80873,GSM80872,GSM80870,	To the Experiment
2	Spinal Cord-[1]	5136.21	29.54	GSM18943,GSM18944,	To the Experiment
3	Temporal Lobe-[2]	5129.79	1176.15	GSM80835,GSM80860,GSM80861,GSM80851,GSM80848,GSM80837,GSM80836,GSM80834,	To the Experiment
3	SVN-[2]	5094.01	2110.71	GSM80910,GSM80909,GSM80879,GSM80896,GSM80893,GSM80881,GSM80880,	To the Experiment
3	Thalamus-[2]	5025.57	1219.34	GSM80839,GSM80862,GSM80863,GSM80852,GSM80849,GSM80841,GSM80840,GSM80838,	To the Experiment
3	Frontal Lobe-[2]	4975.64	1829.56	GSM80660,GSM80666,GSM80678,GSM80677,GSM80676,GSM80675,GSM80667,GSM80671,GSM80661,	To the Experiment
3	Putamen-[2]	4823.24	1438.62	GSM80595,GSM80571,GSM80601,GSM80596,GSM80594,GSM80586,GSM80581,GSM80570,GSM80569,	To the Experiment
3	Hippocampus-[2]	4707.39	2314.31	GSM80664,GSM80682,GSM80681,GSM80680,GSM80665,GSM80663,GSM80679,GSM80668,GSM80662,	To the Experiment
3	Parietal Lobe-[2]	4587.04	1683.43	GSM80746,GSM80763,GSM80762,GSM80744,GSM80761,GSM80760,GSM80752,GSM80747,GSM80745,	To the Experiment
3	Midbrain-[2]	4381.92	1413.59	GSM80699,GSM80715,GSM80701,GSM80706,GSM80705,GSM80704,GSM80703,GSM80702,GSM80700,	To the Experiment
3	Occipital Lobe-[2]	4374.08	1367.3	GSM80773,GSM80772,GSM80767,GSM80756,GSM80775,GSM80754,GSM80766,GSM80774,	To the Experiment
3	Cerebral Cortex-[2]	4288.46	1718.17	GSM80650,GSM80643,GSM80642,GSM80640,GSM80641,GSM80653,GSM80652,GSM80627,GSM80651,	To the Experiment
3	Cerebellum-[2]	3825.05	997.85	GSM80618,GSM80639,GSM80638,GSM80637,GSM80636,GSM80626,GSM80619,GSM80617,GSM80616,	To the Experiment
3	Nodose Nucleus-[2]	3813.86	2541.43	GSM80769,GSM80768,GSM80765,GSM80755,GSM80771,GSM80764,GSM80770,GSM80753,	To the Experiment
2	Prefrontal Cortex-[1]	3706.33	282.88	GSM18929,GSM18930,	To the Experiment
2	Whole Brain-[1]	3598.77	77.35	GSM18921,GSM18922,	To the Experiment
2	Olfactory Bulb-[1]	3473.5	157.57	GSM19019,GSM19020,	To the Experiment
2	Cerebellum-[1]	3081.57	319.85	GSM18917,GSM18918,	To the Experiment
2	Thalamus-[1]	3037.92	346.09	GSM18935,GSM18936,	To the Experiment
1	Cerebellum-[3]	3010.62	0	GSM44689,	To the Experiment
2	Hypothalamus-[1]	2890.04	50.68	GSM18933,GSM18934,	To the Experiment
2	Amygdala-[1]	2826.29	745.36	GSM18927,GSM18928,	To the Experiment
1	Spinal Cord-[3]	2797.68	0	GSM44700,	To the Experiment
2	Occipital Lobe-[1]	2770.45	186.93	GSM18931,GSM18932,	To the Experiment
2	Cerebellum Peduncle-[1]	2652.74	89.1	GSM18915,GSM18916,	To the Experiment
1	Whole Brain-[3]	2625.95	0	GSM44690,	To the Experiment
2	Caudate Nucleus-[1]	2464.17	16.03	GSM18919,GSM18920,	To the Experiment
2	Temporal Lobe-[1]	2442.28	252.64	GSM18911,GSM18912,	To the Experiment
2	Globus Pallidus-[1]	2317.98	1.39	GSM18913,GSM18914,	To the Experiment
2	Parietal Lobe-[1]	2105.36	239.29	GSM18923,GSM18924,	To the Experiment
2	Medulla Oblongata-[1]	2072.26	193.81	GSM18925,GSM18926,	To the Experiment
1	Thalamus-[3]	2032.1	0	GSM44698,	To the Experiment
2	Subthalamic Nucleus-[1]	2012.37	143.97	GSM18937,GSM18938,	To the Experiment
1	Corpus Callosum-[3]	2002.32	0	GSM44696,	To the Experiment
2	Ciliary Ganglion-[1]	1986.35	466.85	GSM19003,GSM19004,	To the Experiment
1	Amygdala-[3]	1959.29	0	GSM44694,	To the Experiment
2	Cingulate Cortex-[1]	1929.74	241.45	GSM18939,GSM18940,	To the Experiment
2	Pons-[1]	1897.07	127.57	GSM18941,GSM18942,	To the Experiment
1	Hippocampus-[3]	1872.39	0	GSM44697,	To the Experiment
2	Atrioventricular Node-[1]	1781.69	53.55	GSM19007,GSM19008,	To the Experiment
2	Dorsal Root Ganglion-[1]	1706.22	136.61	GSM19009,GSM19010,	To the Experiment
1	Caudate Nucleus-[3]	1694.54	0	GSM44695,	To the Experiment
1	Fetal Brain-[3]	1344.34	0	GSM44691,	To the Experiment
2	Trigeminal Ganglion-[1]	1196.24	220.07	GSM19005,GSM19006,	To the Experiment
2	SCG-[1]	841.33	179.25	GSM19011,GSM19012,	To the Experiment
2	Fetal Brain-[1]	817.77	121.49	GSM18945,GSM18946,	To the Experiment
2	Cardiac Myocyte-[1]	10.31	3.91	GSM18969,GSM18970,	To the Experiment
